# Supplementary material for: Cytosolic and Nucleosolic Calcium-Regulated Molecular Networks in Response to Long-Term Treatment with Abscisic Acid and Methyl Jasmonate in Arabidopsis thaliana
Source: MDPI journal article supplement (doi:10.3390/genes13030524), 2022-03-16

## Supplementary material

**Table S1.** Primers used in this study.

**Table S2.** [Ca<sup>2+</sup>]-regulated ABA-responsive genes.

**Table S3.** [Ca<sup>2+</sup>]-regulated JA-responsive genes.

**Table S4.** Microarray datasets used for the construction of co-expression networks.

**Table S5.** Decoding Ca<sup>2+</sup> signalling proteins.

**Table S6.** Hormone signalling pathway proteins.

**Table S7.** Genes in the co-expression network.

**Table S8.** Genes co-expressed with *CAM1*, *CIPK8*, *GAD1*, and *GUN5*.

**Figure S1.** Characterisation of *A. thaliana* T-DNA insertion mutants *cam1*, *cipk8*, and *gad1*. (A)

Schematic diagram for T-DNA insertion in the *A. thaliana* genome of *cam1* (SALK\_202076c), *cipk8* (SALK\_139697c), and *gad1* (SALK\_022227). Open box, UTR; black box, exon; line, intron. Bar = 100 bp. (B) Genotypes of *cam1*, *cipk8*, and *gad1* were identified by PCR. *A. thaliana* wild-type (WT) was used as the control. *Actin2* was used as the experimental control.

LP, LB, and RP primers were used for PCR and are listed in Table S1. (C) Expression patterns of *CAM1*, *CIPK1*, and *GAD1* were detected by RT-PCR in *cam1*, *cipk8*, and *gad1* plants, respectively. WT was used as the control. *Actin2* was used as the experimental control. Primers

used for PCR are listed in Table S1.

**Figure S2.** Volcano plots of the total gene expression profiles of WT, *PV-NES*, and *PV-NLS* transgenic lines after treatment with ABA (A–C) or MeJA (D–F). Each dot represents the mean expression level of individual genes obtained from a normalised microarray dataset. Cut-off

values (yellow lines) were established using the following parameters: fold = |2.0| and P-value with false discovery rate correction = 0.05. Genes above the cut-off values were regarded as differentially expressed genes, either downregulated (green dots) or upregulated (red dots).

**Figure S3.** Venn diagram identifying the unique and shared genes among *PV-NES* and *PV-NLS* transgenic lines after treatment with ABA or MeJA.

**Figure S4.** Interactions of several  $[Ca^{2+}]_{cyt}$ -regulated ABA-responsive genes with four hub genes in tobacco leaves, as determined by LCI assays. Tobacco leaves were transformed with constructs encoding full-length *ndhA*, *psb1*, *PGSIP2*, *CAPE2*, and *AT1G64330* fused with c-LUC, and constructs encoding full-length *GAD1*, *CAM1*, *CIPK8*, and *At1G28400* fused with nLUC. Empty vectors were used as negative controls. Luminescence intensity indicates an interaction between any two proteins. Experiments were repeated three times and a representative read-out is shown.

**Figure S5.** Interactions of two  $[Ca^{2+}]_{cyt}$ -regulated JA-responsive genes with three hub genes in tobacco leaves, as determined by LCI assays. Tobacco leaves were transformed with constructs encoding full-length *AT3G45160* and *HIR2* fused with cLUC, and constructs encoding full-length *GAD1*, *CAM1*, and *CIPK8* fused with nLUC. Empty vectors were used as negative controls. Luminescence intensity indicates an interaction between any two proteins. Experiments were repeated three times and a representative read-out is shown.

**Figure S6.** Interactions of two  $[Ca^{2+}]_{cyt}$ - and  $[Ca^{2+}]_{nuc}$ -regulated ABA-responsive genes with three hub genes in tobacco leaves, as determined by LCI assays. Tobacco leaves were transformed with constructs encoding full-length *RCI2B* and *NTMC2T6.1* fused with cLUC, and constructs encoding full-length *GAD1*, *CAM1*, and *CIPK8* fused with nLUC. Empty vectors were

used as negative controls. Luminance intensity indicates an interaction between any two proteins. Experiments were repeated three times and a representative read-out is shown.

**Figure S7.** Interactions of two  $[Ca^{2+}]_{cyt-}$  and  $[Ca^{2+}]_{nuc-}$  regulated JA-responsive genes with three hub genes in tobacco leaves, as determined by LCI assays. Tobacco leaves were transformed with constructs encoding full-length *AT1G54410* and *AT3G19370* fused with cLUC, and constructs encoding full-length *GAD1*, *CAM1*, and *CIPK8* fused with nLUC. Empty vectors were used as negative controls. Luminance intensity indicates an interaction between any two proteins. Experiments were repeated three times and a representative read-out is shown.

Figure S1

A

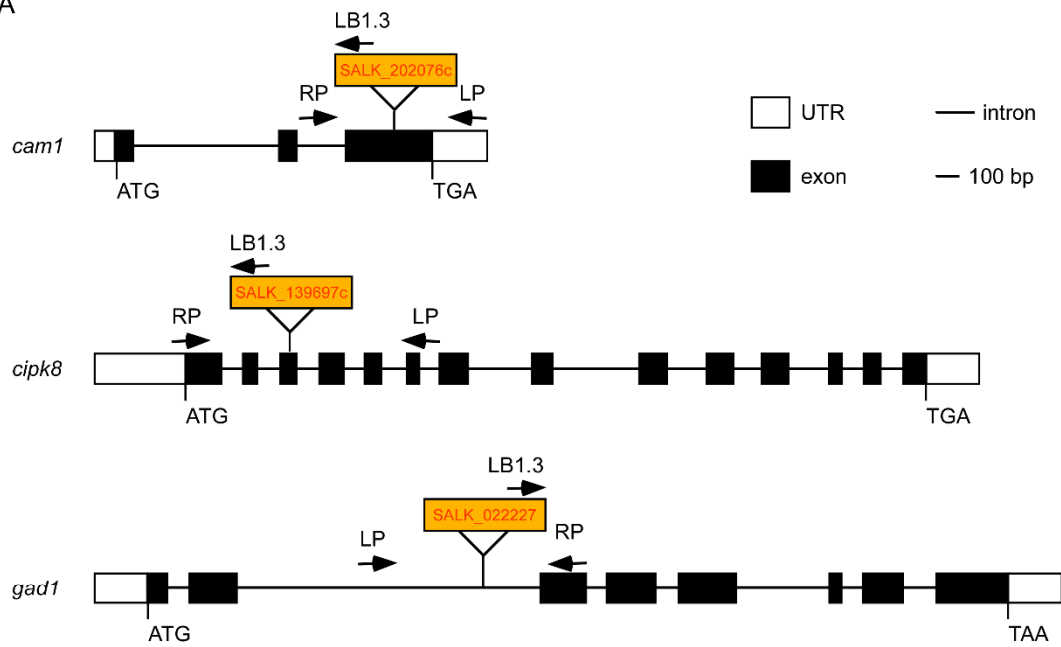

B

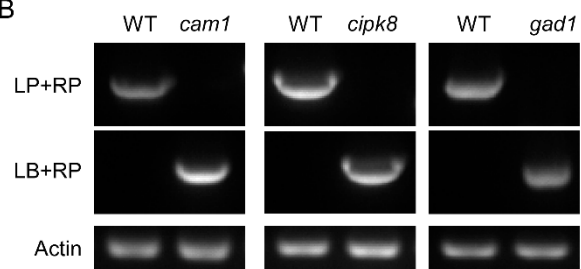

C

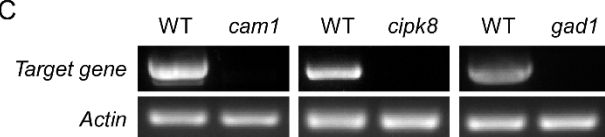

Figure S2

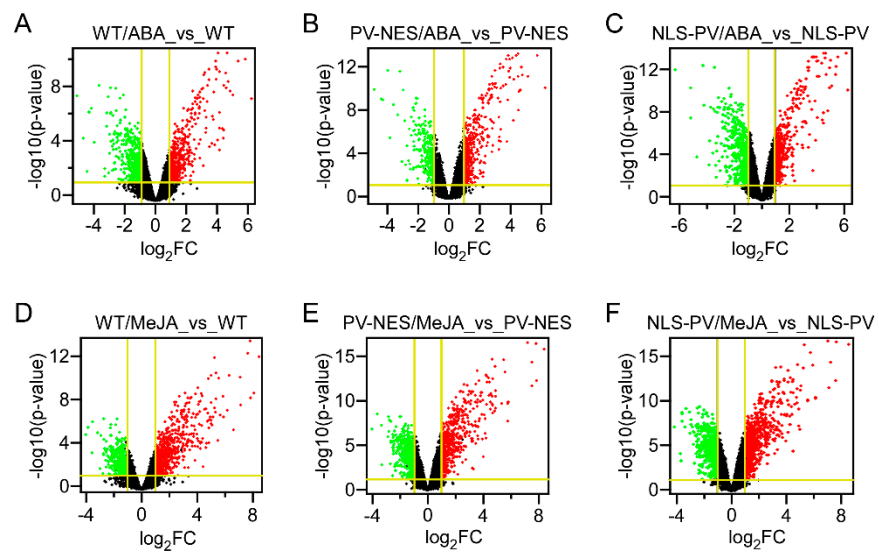

Figure S3

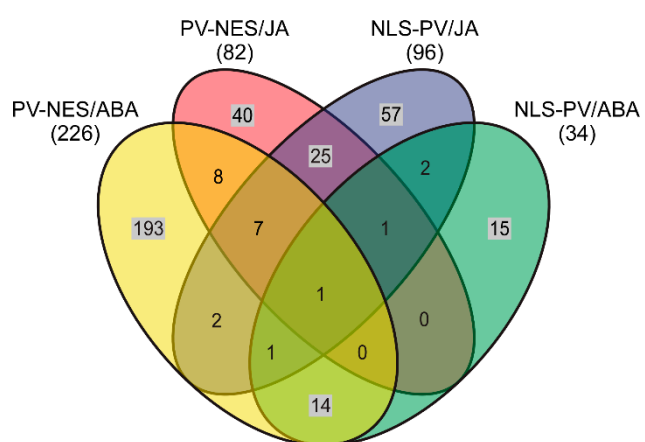

Figure S4

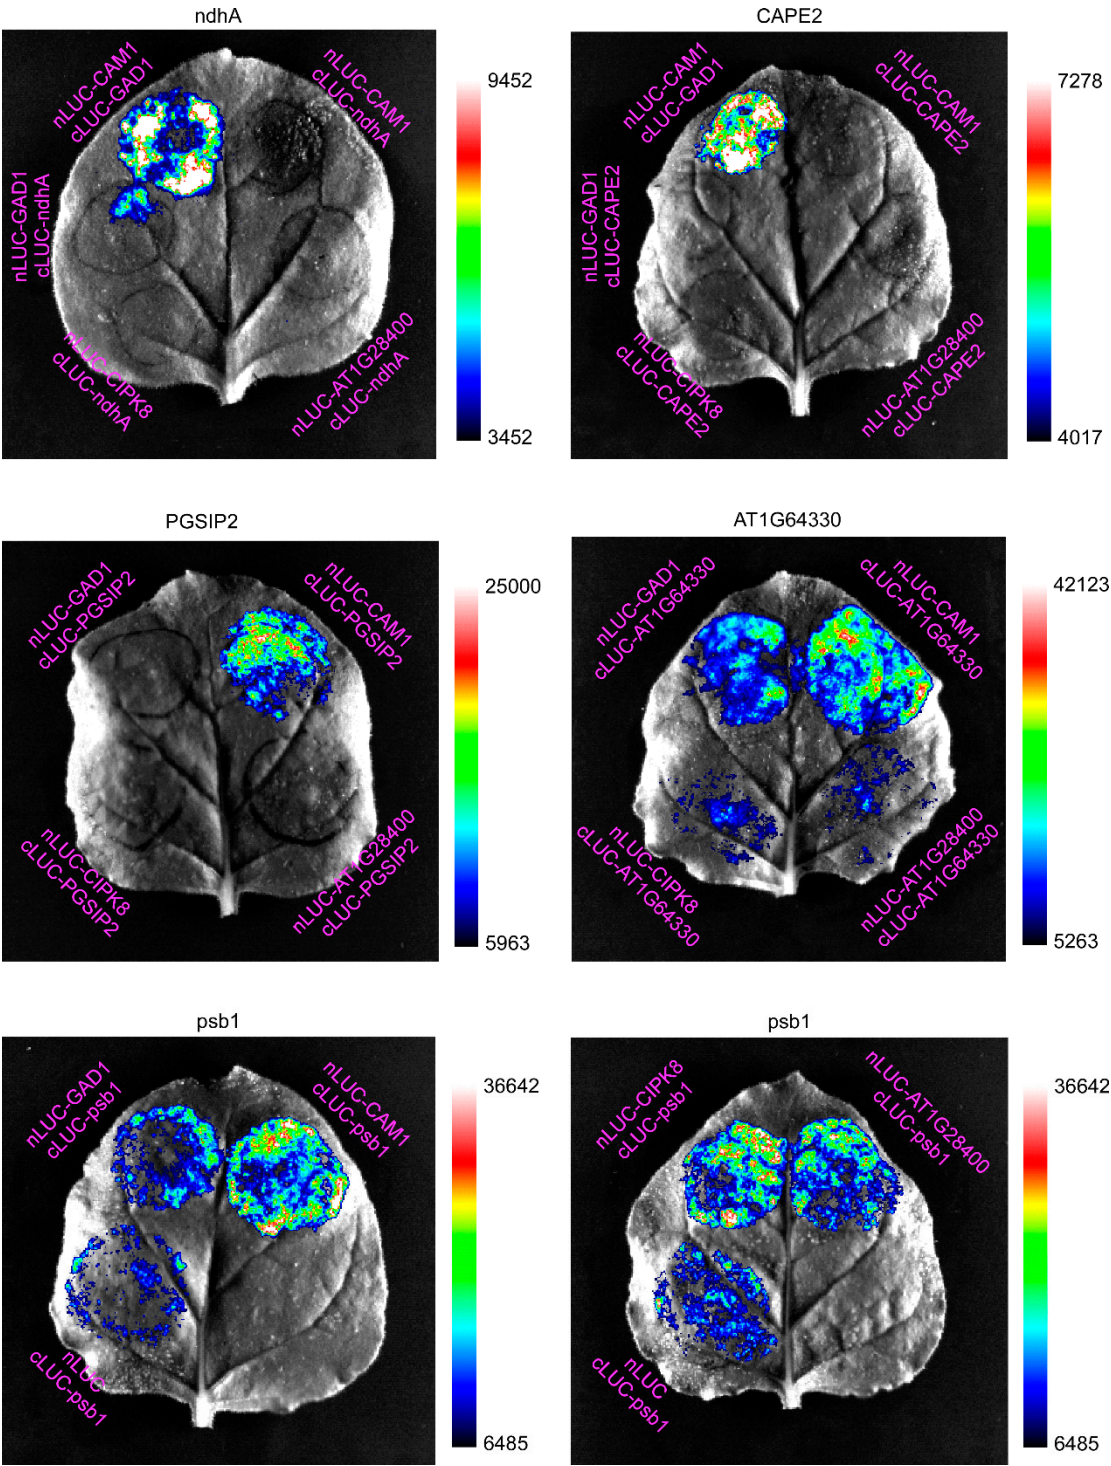

Figure S5

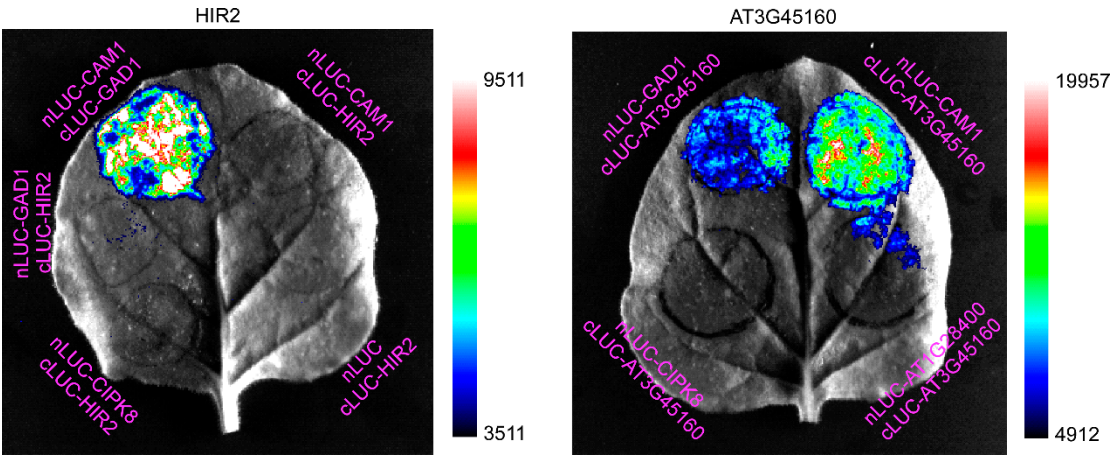



Figure S6

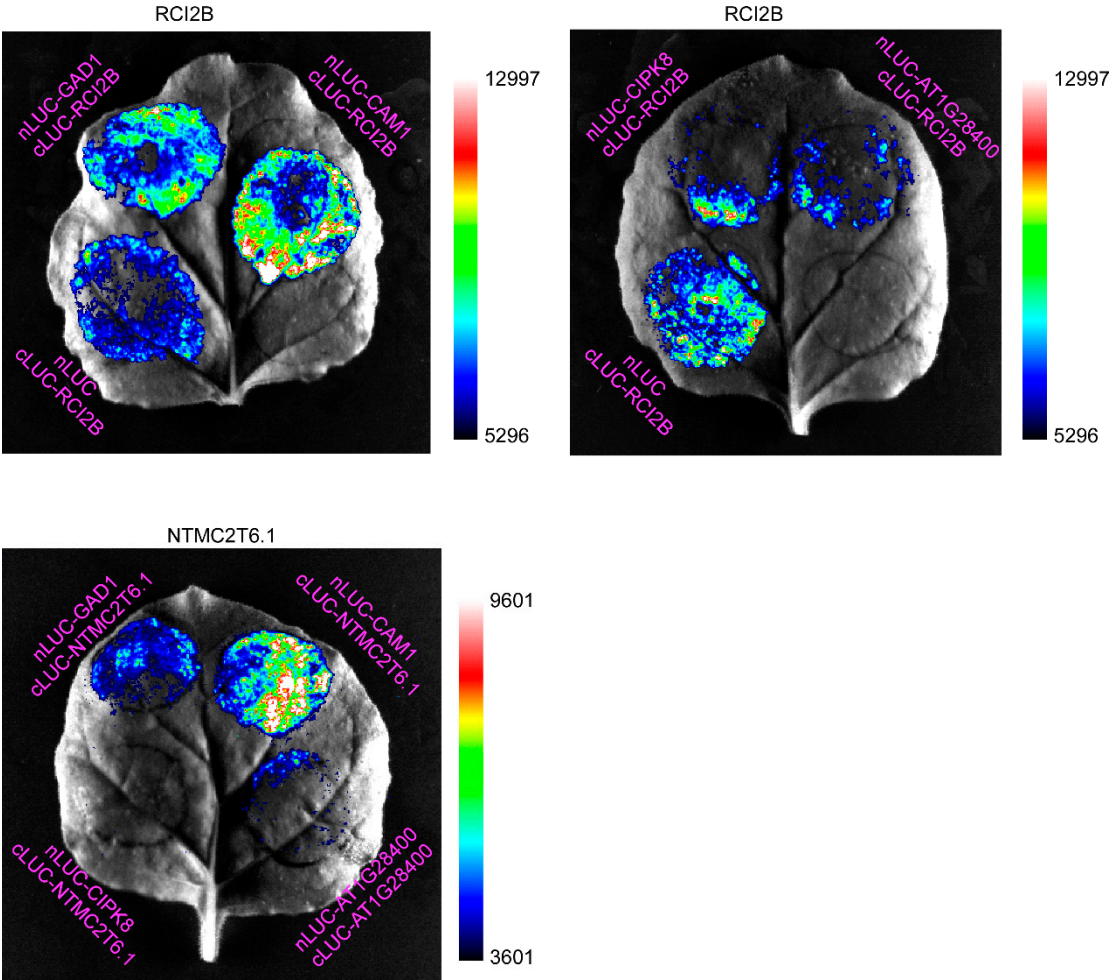

Figure S7

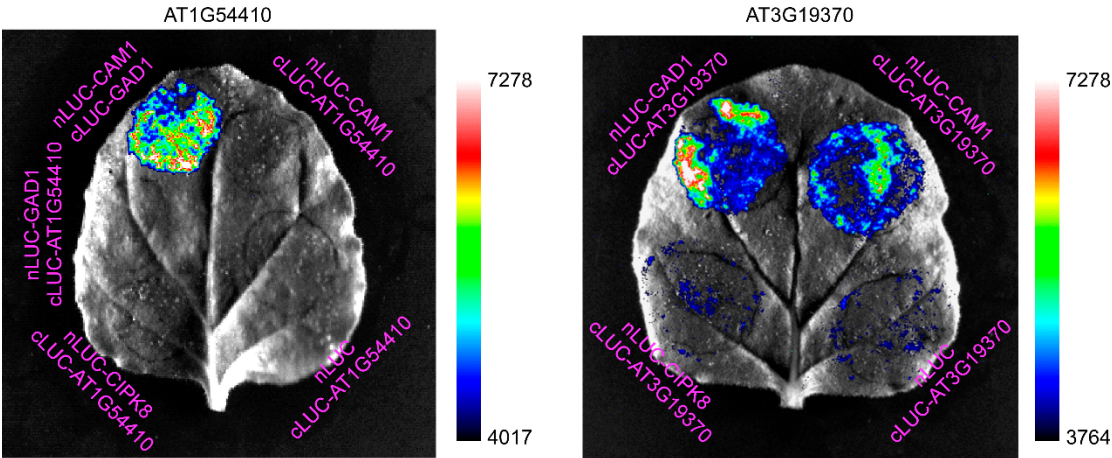

Supplement: s1 [file s1]
