# Supplementary material for: Cytosolic and Nucleosolic Calcium-Regulated Molecular Networks in Response to Long-Term Treatment with Abscisic Acid and Methyl Jasmonate in Arabidopsis thaliana
Source: MDPI journal article supplement (doi:10.3390/genes13030524), 2022-03-16
Supplement: s1 [file s1]

**Table S1.** Primers used in this study.

| Primer                                |                             | Sequence (5'-3')                                         |
|---------------------------------------|-----------------------------|----------------------------------------------------------|
| LB1.3                                 |                             | ATTTTGCCGATTTTCGGAAC                                     |
| Primers<br>for<br>verifying<br>mutant | <i>cam1</i> (SALK_202076c)  | LP: TCAGCGACCTCTGTTTGTCTG<br>RP: GCTTTTACCCATGACAAAAGTGC |
|                                       | <i>cipk8</i> (SALK_139697c) | LP: AGATGTCACTGAGAACCCCCA<br>RP: CCCCCAACCCTTGTTACTTT    |
|                                       | <i>gad1</i> (SALK_022227c)  | LP: TTGTTTTTGGGGGAGGTTGGA<br>RP: TTGAACATTGGCTCCGGTGA    |
|                                       | <i>CAM1-F</i>               | GCGATGTGTTTGTCTCTCTG                                     |
|                                       | <i>CAM1-R</i>               | CCCATCGGTTTCAATCCAAGTCA                                  |
|                                       | <i>CIPK8-F</i>              | CTTGCCCCTCATATTTTGCC                                     |
| RNA level<br>in mutant                | <i>CIPK8-R</i>              | CATCGCATCAGACCGTATTC                                     |
|                                       | <i>GAD1-F</i>               | TTTGTGACGACATGGATGGA                                     |
|                                       | <i>GAD1-R</i>               | TCAAGGAGAAAGCGACAAGT                                     |
| Primers<br>for<br>qRT-PCR             | <i>ERF104-F</i>             | GACGAAGACCGTGGGGAAAA                                     |
|                                       | <i>ERF104-R</i>             | AAGCTCTTCCAGCTTCCACG                                     |
|                                       | <i>NCED3-F</i>              | AGGTCGCAAGATTCGGGATT                                     |
|                                       | <i>NCED3-R</i>              | GCGGATTTCAAGACAGGACACTC                                  |
|                                       | <i>PR1-F</i>                | CTCATACACTCTGGTGGG                                       |
|                                       | <i>PR1-R</i>                | TTGGCACATCCGAGTC                                         |
|                                       | <i>AGL21-F</i>              | CTTCATGCTGGAGCTTGCAAAGTC                                 |
|                                       | <i>AGL21-R</i>              | AGCTATTCTCTGTGATGCCGAGGT                                 |
|                                       | <i>CAM1-F</i>               | GATGATGATGACCTTTTATGC                                    |
|                                       | <i>CAM1-R</i>               | TTACACACAAAAGTCACAAACC                                   |
|                                       | <i>CIPK8-F</i>              | AAGGTTCACTCTACACAAGC                                     |
|                                       | <i>CIPK8-R</i>              | TATTCTTCTGCGTCTCCTGC                                     |
|                                       | <i>GAD1-F</i>               | GCACCGTTAGAAGAGGCGGA                                     |
|                                       | <i>GAD1-R</i>               | TTGCCTTCAGCTTTGCGCTT                                     |

---

*Actin2-F*

TAACAGGGAGAAGATGACTCAGATCA

*Actin2-R*

AAGATCAAGACGAAGGATAGCATGAG

---
