# Supplementary material for: Cytosolic and Nucleosolic Calcium-Regulated Molecular Networks in Response to Long-Term Treatment with Abscisic Acid and Methyl Jasmonate in Arabidopsis thaliana
Source: MDPI journal article supplement (doi:10.3390/genes13030524), 2022-03-16
Supplement: s1 [file s1]

**Table S4.** Microarray datasets used for the construction of co-expression networks.

| GEO no    | Arrays | Used | Chip   | Cel | Description                                                                                                                       | Refs                     |
|-----------|--------|------|--------|-----|-----------------------------------------------------------------------------------------------------------------------------------|--------------------------|
| GSE12715  | 12     | 7    | GPL198 | Y   | Samples from wild type (Col), aba2 (or gin1-3), etr1-1, and ein2-1, which were grown on 1% sucrose agar plates for 12 to 14 days. | (Hu et al., 2013)        |
| GSE45662  | 10     | 10   | GPL198 | Y   | 21-day-old seedlings treated with 100 $\mu$ M MeJA for various time periods (0, 1, and 4 hours).                                  |                          |
| GSE84446  | 48     | 27   | GPL198 | Y   | 8 timepoints after control or ACC treatment done in triplicate.                                                                   |                          |
| GSE39384  | 72     | 57   | GPL198 | Y   | Arabidopsis seedlings of the wild-type or hormone mutants were treated with plant hormones.                                       | (Goda et al., 2008)      |
| GSE7432   | 16     | 15   | GPL198 | Y   | Ethylene and auxin on the root of mutant or WT Arabidopsis.                                                                       | (Stepanova et al., 2007) |
| GSE5620   | 36     | 29   | GPL198 | Y   | 36 samples used as control in stress treatment.                                                                                   | (Kilian et al., 2007)    |
| GSE109611 | 29     | 20   | GPL198 | Y   | 3-day-old WT, NES-PV and NLS-PV seedlings treated with 10 $\mu$ M ABA, 50 $\mu$ M MeJA and 100 $\mu$ M ACC for 5 days.            |                          |

**Goda H, Sasaki E, Akiyama K, et al.** (2008). The AtGenExpress hormone and chemical treatment data set: experimental design, data evaluation, model data analysis and data access. *The Plant Journal* **55**: 526-542.

**Hu P, Zhou W, Cheng Z, et al.** (2013). JAV1 controls jasmonate-regulated plant defense. *Molecular Cell* **50**: 504-515.

**Kilian J, Whitehead D, Horak J, et al.** (2007). The AtGenExpress global stress expression data set: protocols, evaluation and model data analysis of UV-B light, drought and cold stress responses. *The Plant Journal* **50**: 347-363.

**Stepanova A N, Yun J, Likhacheva A V, et al.** (2007). Multilevel interactions between ethylene and auxin in Arabidopsis roots. *The Plant Cell* **19**: 2169-2185.
