# Supplementary material for: Cytosolic and Nucleosolic Calcium-Regulated Molecular Networks in Response to Long-Term Treatment with Abscisic Acid and Methyl Jasmonate in Arabidopsis thaliana
Source: Genes (Basel). 2022 Mar 16;13(3):524. doi: 10.3390/genes13030524 (PMC8950999; doi:10.3390/genes13030524)
Supplement: Supplementary file 1 [file genes-13-00524-s001.zip]

Archive with 9 entries (9 files):
- Supplementary information.pdf
- Table S1 Primers used in this study.pdf
- Table S2 Ca-regulated ABA responsive genes.xlsx
- Table S3 Ca-regulated JA responsive genes.xlsx
- Table S4 Microarray datasets used for the construction of co-expression networks.pdf
- Table S5 Calcium signal-decoding proteins.xlsx
- Table S6 Hormone signaling pathway proteins.xlsx
- Table S7 The genes in co-expression network.xlsx
- Table S8 Genes co-expressed with CAM1, CIPK8, GAD1, and GUN5.xlsx
