# Supplementary material for: Cytosolic and Nucleosolic Calcium-Regulated Molecular Networks in Response to Long-Term Treatment with Abscisic Acid and Methyl Jasmonate in Arabidopsis thaliana
Source: Genes (Basel). 2022 Mar 16;13(3):524. doi: 10.3390/genes13030524 (PMC8950999; doi:10.3390/genes13030524)
Supplement: Supplementary file 1 [file genes-13-00524-s001.zip › Table S2 Ca-regulated ABA responsive genes.xlsx]

## Sheet: Ca-regulated ABA responsive
[Ca2+]cyt-upregulated
Ensembl ID	Gene Name	logFC.(NESABA/NES)	adj.P.Val.	logFC.(WTABA/WT)	adj.P.Val.	logFC.(NESABA/WTABA)	adj.P.Val.	Target.Description
AT1G03080	AT1G03080	0.24279	0.564427	1.56863	0.00243306	-0.97311	0.252528	Kinase interacting (KIP1-like) family protein
AT1G03495	AT1G03495	1.15181	0.0392945	2.50745	0.00363349	-1.05504	0.58594	HXXXD-type acyl-transferase family protein
AT1G05320	AT1G05320	0.127217	0.768849	1.22992	0.00718897	-0.897501	0.235904	Myosin heavy chain, embryonic smooth protein
AT1G10250	SNL6	-0.10067	0.791258	1.00179	0.0114548	-0.795825	0.225852	Paired amphipathic helix Sin3-like protein
AT1G13350	AT1G13350	-0.120828	0.835827	1.75834	0.00338962	-0.974197	0.38964	Protein kinase superfamily protein
AT1G17360	AT1G17360	0.0513132	0.922501	1.13505	0.0168805	-0.771904	0.402671	Protein phosphatase 1 regulatory subunit-like protein
AT1G21310	ATEXT3	-1.29983	0.0135886	0.00559252	0.99721	-0.522035	0.87913	Extensin 3
AT1G28400	AT1G28400	-1.49396	4.57e-05	0.163674	0.831165	-0.698381	0.533028	GATA zinc finger protein
AT1G44910	PRP40A	-0.00461926	0.992037	1.46083	0.000236641	-1.00127	0.0648754	Pre-mRNA-processing protein 40A
AT1G48130	PER1	3.39048	5.46e-06	4.62393	4.22e-05	-0.177457	0.982327	1-cysteine peroxiredoxin 1
AT1G52000	AT1G52000	0.812123	0.084464	2.26027	0.001768	-0.520189	0.839937	Mannose-binding lectin superfamily protein
AT1G53870	AT1G53870	1.31773	0.000100383	2.34058	2.32e-05	0.0420413	0.991966	LURP-one-like protein (DUF567)
AT1G58250	SAB	-0.0851905	0.890118	1.15983	0.0463251	-0.863772	0.477093	Unknown protein
AT1G63640	AT1G63640	0.171931	0.588039	1.21147	0.00177881	-0.751528	0.229242	P-loop nucleoside triphosphate hydrolases superfamily protein with CH (Calponin Homology) domain-containing protein
AT1G64330	AT1G64330	0.196884	0.683589	1.49794	0.00615137	-1.03047	0.256253	Myosin heavy chain-like protein
AT1G65010	AT1G65010	-0.0943329	0.8865	1.91838	0.002796	-1.35876	0.173076	Hypothetical protein predicted by genemark.hmm
AT1G67110	CYP735A2	-1.04028	0.00108346	0.123378	0.865173	-0.292944	0.890218	Member of CYP735A
AT1G68790	LINC3	-0.389446	0.380503	1.71718	0.00362685	-1.68808	0.0381027	Little nuclei 3
AT1G69070	AT1G69070	-0.0981736	0.816808	1.12605	0.0093753	-1.00269	0.137957	Nucleolar-like protein
AT1G72510	AT1G72510	0.217724	0.553545	1.29319	0.00415168	-0.269093	0.890218	DUF1677 family protein (DUF1677)
AT1G76810	EIF5B1	-0.0969679	0.75508	1.11312	0.0011418	-0.808329	0.111139	Eukaryotic translation initiation factor 2 (eIF-2) family protein
AT1G77130	PGSIP2	0.335566	0.413757	1.42288	0.00750492	-0.466478	0.772412	Plant glycogenin-like starch initiation protein 2
AT2G16370	THY-1	0.120231	0.780286	1.30406	0.00446408	-0.331013	0.842163	Thymidylate synthase 1
AT2G18050	HIS1-3	2.82536	3.2e-07	3.94506	2.08e-06	-0.386704	0.899825	Histone H1-3
AT2G23000	SCPL10	0.0627641	0.912445	1.22902	0.0189103	-0.828362	0.431604	Serine carboxypeptidase-like 10
AT2G28620	AT2G28620	-0.200026	0.560554	1.04511	0.0114548	-0.831315	0.225852	P-loop containing nucleoside triphosphate hydrolases superfamily protein
AT2G28720	AT2G28720	0.189215	0.682728	1.29548	0.0126479	-1.06663	0.214998	Histone superfamily protein
AT2G31970	RAD50	-0.129645	0.811854	1.43669	0.010093	-1.26856	0.146437	Arabidopsis RAD50 homologue
AT2G33790	AGP30	-1.12137	0.0444858	0.268539	0.827837	-0.132901	0.983234	Arabinogalactan protein 30
AT2G36580	AT2G36580	0.112741	0.817453	1.36843	0.00632733	-0.360753	0.845012	Pyruvate kinase family protein
AT2G36640	ECP63	1.76551	1.05e-06	3.00091	3.43e-07	-1.06851	0.145732	Embryonic cell protein 63
AT2G46250	AT2G46250	-0.131867	0.748838	1.22216	0.00602317	-0.664385	0.465145	Myosin heavy chain-like protein
AT2G46670	APRR9	0.377743	0.470961	1.39718	0.0334065	-1.09429	0.387232	CCT motif family protein
AT3G01260	AT3G01260	-2.18051	1.39e-07	-0.943446	0.0633588	-0.142727	0.965424	Galactose mutarotase-like superfamily protein
AT3G04760	AT3G04760	0.291435	0.474517	1.44636	0.00521852	-0.83292	0.397164	Pentatricopeptide repeat (PPR-like) superfamily protein
AT3G10270	GYRB1	-0.0264485	0.938872	1.03371	0.00113579	-0.702202	0.142359	DNA gyrase subunit B
AT3G16000	MFP1	-0.213837	0.708042	1.32935	0.0339905	-1.0456	0.386993	Myosin heavy chain-like protein
AT3G19170	PREP1	0.129792	0.722942	1.19761	0.00317048	-0.486605	0.597773	Presequence protease 1
AT3G21370	BGLU19	1.08601	0.0369323	2.41319	0.00280152	-0.37537	0.921144	Beta glucosidase 19
AT3G23000	CIPK7	-0.0486058	0.914679	1.03145	0.0132174	-0.0476767	0.98808	CBL-interacting protein kinase 7
AT3G25690	CHUP1	0.368878	0.146871	1.52194	0.000133431	-0.744348	0.223813	Hydroxyproline-rich glycoprotein family protein
AT3G28220	AT3G28220	0.215615	0.786773	1.84697	0.0255542	-0.551491	0.870173	TRAF-like family protein
AT3G28290	AT14A	1.20471	0.0207078	2.67243	0.00119607	-0.92995	0.627723	At14a-1 protein
AT3G44050	AT3G44050	-0.0950046	0.844533	1.57844	0.00160502	-1.45101	0.0355738	P-loop containing nucleoside triphosphate hydrolases superfamily protein
AT3G53480	PDR9	-0.113337	0.716735	1.34761	0.000236641	-0.350234	0.704525	Pleiotropic drug resistance 9
AT3G57010	AT3G57010	1.30723	0.00272944	2.46738	0.000456086	-0.236435	0.954477	Calcium-dependent phosphotriesterase superfamily protein
AT3G57660	NRPA1	0.0762055	0.894542	1.36846	0.0123192	-0.786442	0.495394	Nuclear RNA polymerase A1
AT3G61520	AT3G61520	0.290449	0.346052	1.30461	0.00191067	-0.593032	0.490317	Pentatricopeptide repeat (PPR) superfamily protein
AT4G00930	CIP4.1	0.0581624	0.88775	1.25798	0.00176479	-0.695121	0.313934	COP1-interacting protein 4.1
AT4G12310	CYP706A5	0.440907	0.128886	1.63969	0.000294092	-1.15746	0.061207	Flavonoid 3,5-hydroxylase-like protein
AT4G14760	AT4G14760	0.0905072	0.877909	1.55062	0.0063173	-1.02567	0.289258	Kinase interacting (KIP1-like) family protein
AT4G18240	SS4	0.186763	0.722105	1.3208	0.0202254	-1.2701	0.158964	Starch synthase 4
AT4G21020	AT4G21020	1.87544	3.69e-08	3.14503	1.57e-08	-1.12234	0.0561755	Late embryogenesis abundant protein (LEA) family protein
AT4G22870	LDOX	0.624391	0.116772	1.93794	0.00130753	-0.910018	0.437491	2-oxoglutarate (2OG) and Fe(II)-dependent oxygenase superfamily protein
AT4G31870	GPX7	1.20601	0.00271841	2.29175	0.000425417	-0.702668	0.637815	Glutathione peroxidase 7
AT4G34890	XDH1	-0.0181359	0.97152	1.05237	0.0105737	-0.447776	0.673099	Xanthine dehydrogenase 1
AT4G36520	AT4G36520	-0.178545	0.581149	1.20334	0.00228808	-0.855357	0.16111	Trichohyalin-like protein
AT4G37820	AT4G37820	0.0155082	0.977932	1.22871	0.00543662	-0.831448	0.256253	Transmembrane protein
AT4G39210	APL3	1.31305	0.00777917	2.32022	0.00270491	-1.02432	0.532263	Glucose-1-phosphate adenylyltransferase (APL3)
AT5G06440	AT5G06440	0.228912	0.44319	1.29361	0.00103589	-0.643592	0.365752	Polyketide cyclase/dehydrase/lipid transport superfamily protein
AT5G09350	PI4KBETA2	0.0498564	0.920189	1.25855	0.00566642	-0.351966	0.818037	Phosphatidylinositol 4-kinase
AT5G15920	SMC5	-0.131385	0.728034	1.04543	0.010676	-0.798919	0.242676	Structural maintenance of chromosomes 5
AT5G25180	CYP71B14	0.14965	0.49848	1.2023	6.81e-05	-0.919476	0.0154337	Cytochrome P450 71B1-like protein
AT5G28300	GT2L	-0.348269	0.263778	1.07175	0.0122828	-1.4483	0.0142717	A Ca(2+)-dependent CaM-binding protein
AT5G40340	AT5G40340	-0.455974	0.254416	2.00623	0.000561718	-1.87902	0.0142717	Tudor/PWWP/MBT superfamily protein
AT5G40450	AT5G40450	-1.1959	0.00419612	0.805226	0.22665	-1.65715	0.0802078	A-kinase anchor-like protein
AT5G53020	AT5G53020	0.444277	0.377887	1.44606	0.0275001	-0.913933	0.513734	Ribonuclease P protein subunit P38-like protein
AT5G55300	FAS5	-0.277143	0.46467	1.15525	0.0156108	-1.08589	0.14693	DNA topoisomerase I alpha
AT5G55660	AT5G55660	-0.528961	0.109272	1.06754	0.0273408	-1.30244	0.0665188	DEK domain-containing chromatin associated protein
AT5G56850	AT5G56850	0.122396	0.771694	1.15008	0.00968289	-1.01877	0.141679	Hypothetical protein
AT5G58760	DDB2	0.211166	0.432416	1.23157	0.000665542	-0.571726	0.386993	Damage-specific DNA binding protein 2
AT5G63320	NPX1	-0.10507	0.741966	1.07278	0.00224838	-0.919813	0.0665188	Nuclear protein X1
AT5G64170	AT5G64170	0.428228	0.294637	1.44991	0.00916267	-0.529991	0.732072	Dentin sialophosphoprotein-like protein
AT5G67240	SDN3	-0.00629155	0.992664	1.25144	0.0304922	-1.00176	0.348204	Small RNA degrading nuclease 3
ATCG00080	PSBI	0.38837	0.422726	1.9658	0.00206814	-0.569192	0.757003	PSII I protein
ATCG00300	YCF9	-0.403265	0.260588	1.04752	0.0329685	-0.752865	0.453774	A subunit of photosystem II (PsbZ)
ATCG00550	PSBJ	-0.155421	0.680574	1.02361	0.0154716	-0.403435	0.732924	PSII component
ATCG00740	RPOA	0.29613	0.526681	1.88074	0.00140772	-0.911842	0.419045	RNA polymerase alpha subunit
ATCG00780	RPL14	0.323383	0.511127	1.65081	0.00680745	-1.13373	0.270067	Chloroplast ribosomal protein L14
ATCG00800	RPS3	0.237624	0.680627	2.19212	0.00109434	-0.862588	0.539134	Chloroplast ribosomal protein S3
ATCG00810	RPL22	0.406902	0.472248	1.98648	0.00572331	-0.887208	0.58594	Chloroplast ribosomal protein L22
ATCG00820	RPS19	0.166246	0.763789	1.94406	0.00130345	-0.835714	0.496541	Ribosomal protein S19
ATCG01000	YCF1.1	-0.12635	0.814047	1.91946	0.000829843	-1.50856	0.0589165	Ycf1 protein
ATCG01060	PSAC	0.0669249	0.914621	1.13367	0.0470858	-0.734843	0.573736	PsaC subunit of photosystem I
ATCG01070	NDHE	-1.49771	0.000916266	0.466092	0.571475	-1.06496	0.434762	NADH dehydrogenase ND4L
ATCG01100	NDHA	-0.0469591	0.928261	1.08163	0.0205946	-0.386638	0.796083	NADH dehydrogenase ND1
[Ca2+]cyt-downregulated
Ensembl ID	Gene Name	logFC.(NESABA/NES)	adj.P.Val.	logFC.(WTABA/WT)	adj.P.Val.	logFC.(NESABA/WTABA)	adj.P.Val.	Target.Description
AT1G05575	AT1G05575	-1.01302	0.089837	-2.80987	0.00205644	1.25628	0.499084	Transmembrane protein
AT1G06830	AT1G06830	-1.92844	3.22e-06	-3.37789	7.01e-07	1.28657	0.138101	CEP downstream 1
AT1G07570	APK1A	-0.444485	0.0640544	-1.56153	7.87e-05	0.720255	0.229242	Protein kinase superfamily protein
AT1G13260	RAV1	-0.151252	0.778329	-1.39133	0.0135134	1.23912	0.164855	AP2/B3 domain transcription factor
AT1G13420	ST4B	1.23184	0.0393575	0.107484	0.94341	1.1003	0.600003	Steroid sulfotransferase
AT1G19020	AT1G19020	-0.858517	0.0992735	-2.32514	0.00305885	1.33621	0.341359	CDP-diacylglycerol-glycerol-3-phosphate 3-phosphatidyltransferase
AT1G19770	PUP14	-0.458921	0.0930662	-1.51163	0.000443606	0.940977	0.137957	Purine permease 14
AT1G21910	DREB26	-0.412492	0.403603	-1.53869	0.0160221	1.17728	0.280766	Dehydration response element-binding protein 26
AT1G24575	AT1G24575	-0.05958	0.927618	-1.25592	0.0332042	0.429659	0.844309	DEAD-box ATP-dependent RNA helicase-like protein
AT1G25400	AT1G25400	0.254761	0.581485	-1.36025	0.013485	1.37382	0.104841	Transmembrane protein
AT1G33055	AT1G33055	0.752388	0.203226	-1.67321	0.0450844	1.77171	0.191049	Hypothetical protein
AT1G34510	AT1G34510	2.05283	0.00505725	0.770019	0.572357	1.24287	0.661805	Peroxidase superfamily protein
AT1G43800	AAD6	-0.156805	0.894784	-2.39098	0.0332619	0.761708	0.862691	Plant stearoyl-acyl-carrier-protein desaturase family protein
AT1G60190	AT1G60190	2.81269	7.33e-08	1.79016	0.00512689	1.05436	0.381291	Plant U-box armadillo repeat protein
AT1G62980	EXPA18	1.20684	0.0357324	-0.0153541	0.992512	0.97469	0.658877	Alpha-expansin 18
AT1G64560	AT1G64560	-0.513801	0.331937	-2.30595	0.00154427	0.374154	0.908249	Pseudogene of S-adenosylmethionine-dependent methyltransferase/rRNA (adenine-N6,N6-)-dimethyltransferase/rRNA methyltransferase
AT1G66080	AT1G66080	-0.0393577	0.939317	-1.17427	0.0108781	0.500177	0.674611	Hikeshi-like protein
AT1G67865	AT1G67865	-1.48151	0.00257943	-2.59326	0.000879139	1.04781	0.507391	Hypothetical protein
AT1G67910	AT1G67910	0.100205	0.777221	-1.00902	0.00699148	0.909791	0.111139	Hypothetical protein
AT1G68840	RAV2	-0.0851292	0.827951	-1.70223	9.25e-05	1.75922	0.00424922	The part of the 'regulator of the (H+)-ATPase of the vacuolar and endosomal membranes' (RAVE)
AT1G69490	NAP	1.01079	0.00508446	-0.223688	0.770163	1.8307	0.0172168	A member of the NAC transcription factor gene family
AT1G80440	KMD1	-0.186555	0.719264	-1.79009	0.00206814	1.97612	0.013509	A member of a family of F-box proteins, called the KISS ME DEADLY (KMD) family
AT2G02990	RNS1	2.26587	0.00360465	0.805981	0.578577	0.711257	0.891404	A member of the ribonuclease T2 family
AT2G04032	ZIP7	-0.491694	0.226247	-1.64417	0.00436853	0.646099	0.645327	Zinc transporter 7 precursor
AT2G15350	FUT10	-0.325372	0.382407	-1.36917	0.00541897	0.0458825	0.991211	Member of glycosyltransferase family- 37
AT2G16060	AHB1	-0.0929934	0.865005	-1.57266	0.00369075	0.597281	0.655705	Class 1 non-symbiotic hemoglobin (AHB1)
AT2G17040	ANAC036	-0.727103	0.252637	-2.38938	0.00673598	1.66059	0.260039	NAC domain containing protein 36
AT2G17880	DJC24	-0.29374	0.506623	-2.0835	0.000340062	1.77125	0.0199559	Chaperone DnaJ-domain superfamily protein
AT2G23680	AT2G23680	-0.343949	0.163547	-1.49798	0.000106213	0.580101	0.396929	Cold acclimation protein WCOR413 family
AT2G25160	CYP82F1	1.49424	0.000535276	0.194375	0.838225	1.01096	0.433228	Cytochrome P450, family 82, subfamily F, polypeptide 1
AT2G25200	AT2G25200	-0.218974	0.684679	-1.42398	0.0180977	1.59809	0.0738655	Hypothetical protein
AT2G25735	AT2G25735	-1.77269	0.000105853	-3.16095	2.32e-05	1.2183	0.280766	Hypothetical protein
AT2G26530	AR781	-0.23673	0.674213	-1.69374	0.00770654	1.27272	0.225852	Unknown function
AT2G27830	AT2G27830	-0.344596	0.233226	-1.88266	3.15e-05	1.67636	0.00513412	Unknown protein
AT2G28400	AT2G28400	1.10603	0.0183413	-0.0724762	0.952409	1.25742	0.334928	Senescence regulator (Protein of unknown function, DUF584)
AT2G32030	AT2G32030	0.10587	0.859144	-1.67198	0.00487723	1.04594	0.311763	Acyl-CoA N-acyltransferases (NAT) superfamily protein
AT2G32560	AT2G32560	-0.233532	0.443044	-1.50819	0.00027619	0.947964	0.111139	F-box family protein
AT2G36220	AT2G36220	-0.0914392	0.876944	-1.10956	0.0489458	1.30377	0.139948	Hypothetical protein
AT2G36790	UGT73C6	0.229821	0.546696	-1.1689	0.0114548	0.943707	0.216917	UDP-glucose:flavonol-3-O-glycoside-7-O-glucosyltransferase
AT2G39650	AT2G39650	-0.190892	0.768973	-1.64272	0.0160221	1.07368	0.434762	Unknown protein
AT2G40000	HSPRO2	-0.385415	0.528303	-2.51103	0.0011418	2.26108	0.0321	Ortholog of sugar beet HS1 PRO-1 2
AT2G40610	EXPA8	-1.69936	0.000307851	-2.72651	0.000246876	1.1381	0.39649	Member of alpha-expansin gene family
AT2G41100	TCH3	-2.11262	0.00118931	-4.22427	8.59e-05	2.31188	0.13602	Calmodulin-like protein
AT2G41730	AT2G41730	-0.533351	0.556079	-2.24919	0.0388863	0.93075	0.78356	Hypothetical protein
AT2G42610	LSH10	-1.05127	0.000381549	-2.7274	5e-07	0.883211	0.224112	Light-dependent short hypocotyls-like protein
AT2G43060	IBH1	-0.250926	0.430512	-1.34643	0.0013479	0.832458	0.216917	ILI1 binding bHLH 1
AT2G43590	AT2G43590	-1.49423	0.000370236	-2.67444	8.3e-05	1.01091	0.397164	Chitinase family protein
AT3G01290	HIR2	-1.96922	8.59e-07	-3.11467	7.92e-07	0.973633	0.267881	SPFH/Band 7/PHB domain-containing membrane-associated protein family
AT3G01850	AT3G01850	-0.0685482	0.839523	-1.08814	0.00189978	0.474117	0.512232	Aldolase-type TIM barrel family protein
AT3G02550	LBD41	2.12777	0.00403114	-1.88347	0.0975681	2.4842	0.164855	LOB domain-containing protein 41
AT3G10020	AT3G10020	-0.400922	0.173142	-1.43876	0.00101686	1.13578	0.0648754	Unknown protein
AT3G11820	SYP121	-0.518201	0.129717	-1.66467	0.00125792	0.870082	0.339838	Syntaxin Related Protein 1 (SYR1), also known as SYP121, Penetration 1/PEN1
AT3G14440	NCED3	1.08292	0.00145147	0.0587945	0.945871	1.22884	0.122284	9-cis-epoxycarotenoid dioxygenase
AT3G15450	AT3G15450	-0.702004	0.0955364	-1.79917	0.0044954	1.73847	0.0561755	Aluminum induced protein with YGL and LRDR motifs
AT3G16530	AT3G16530	-3.86976	2.36e-06	-4.96405	4.28e-05	0.756454	0.856646	Lectin like protein
AT3G16670	AT3G16670	-3.33726	1.71e-08	-4.40766	3.21e-07	0.66713	0.728778	Pollen Ole e 1 allergen and extensin family protein
AT3G16720	TL2	0.212744	0.590722	-1.64063	0.000807867	1.38769	0.0355738	Toxicos en levadura 2
AT3G17110	AT3G17110	1.00361	0.000474928	-0.265691	0.617612	0.931588	0.168159	Hypothetical protein
AT3G18170	AT3G18170	-0.0707952	0.893798	-1.24201	0.0137885	0.627585	0.58594	Glycosyltransferase family 61 protein
AT3G18690	MKS1	-0.183101	0.533374	-1.42797	0.000208802	0.755189	0.194019	Map kinase substrate 1
AT3G19380	PUB25	0.0859797	0.853686	-1.03719	0.0236077	1.01699	0.164265	Plant U-box 25
AT3G20470	GRP5	-0.03014	0.95244	-1.0973	0.0095253	0.631449	0.468496	Glycine-rich protein 5
AT3G22240	AT3G22240	-0.59654	0.280297	-1.6178	0.0312673	1.01167	0.533028	Cysteine-rich/transmembrane domain PCC1-like protein
AT3G23450	AT3G23450	-0.00138649	0.997498	-1.31329	0.00189978	0.477078	0.63087	Transmembrane protein
AT3G26200	CYP71B22	-0.63571	0.176073	-1.83151	0.00679725	0.100847	0.983834	Putative cytochrome P450
AT3G46600	AT3G46600	-0.307367	0.520393	-1.39214	0.0171544	1.33988	0.143044	GRAS family transcription factor
AT3G46620	AT3G46620	1.16344	0.0168996	-0.273624	0.795304	1.22814	0.395379	ABA- and drought-induced RING-DUF1117 gene
AT3G49530	NAC062	0.0165458	0.972669	-1.3657	0.000875811	1.00927	0.0868375	NAC domain containing protein 62
AT3G49580	LSU1	-1.62387	0.00155237	-2.7301	0.000793477	0.937417	0.603549	Response to low sulfur 1
AT3G50060	MYB77	0.165703	0.758051	-2.0039	0.0007984	1.93951	0.0142717	R2R3-MYB transcription factor
AT3G56710	SIB1	-0.955309	0.143345	-2.06784	0.0283314	0.904174	0.732496	Sigma factoe binding protein 1
AT4G01250	WRKY22	0.650373	0.0601387	-1.19614	0.0210053	1.64487	0.0248874	A member of WRKY transcription factor
AT4G10270	AT4G10270	2.28697	0.000474928	-1.32569	0.18599	2.0994	0.173928	Wound-responsive family protein
AT4G11000	AT4G11000	-0.298922	0.293887	-1.69611	6.67e-05	0.860895	0.158889	Ankyrin repeat family protein
AT4G11210	AT4G11210	1.87647	0.0124889	0.0853674	0.965923	1.48091	0.573736	Disease resistance-responsive (dirigent-like protein) family protein
AT4G11300	AT4G11300	-0.32023	0.123369	-1.37551	4.65e-05	1.05578	0.013509	ROH1, putative (DUF793)
AT4G12490	AZI3	-2.72392	0.0204663	-4.72252	0.00901355	1.52077	0.787862	A member of the AZI family of lipid transfer proteins
AT4G12500	AT4G12500	-1.97953	0.0464301	-3.51192	0.0191094	1.27949	0.784184	Bifunctional inhibitor/lipid-transfer protein/seed storage 2S albumin superfamily protein
AT4G17490	ERF6	-0.105417	0.925341	-2.7833	0.00632733	2.18696	0.173928	A member of the ERF (ethylene response factor) subfamily B-3 of ERF/AP2 transcription factor family (ATERF-6)
AT4G19420	AT4G19420	0.0592532	0.884529	-1.29232	0.00125235	1.12954	0.0381027	Pectinacetylesterase family protein
AT4G20070	AAH	-0.268231	0.400506	-1.32246	0.00189978	0.835654	0.224112	Allantoate amidohydrolase
AT4G23810	WRKY53	-1.10404	0.0545114	-2.16334	0.0125823	1.26579	0.486659	Member of WRKY transcription factor
AT4G24110	AT4G24110	0.113525	0.870135	-1.377	0.0391871	0.77696	0.630351	NADP-specific glutamate dehydrogenase
AT4G25470	CBF2	1.70553	0.031281	-0.509118	0.758103	1.82021	0.464327	A member of the DREB subfamily A-1 of ERF/AP2 transcription factor family (CBF2)
AT4G25780	CAPE2	1.52866	1.96e-05	0.476626	0.393696	0.390312	0.81934	Cysteine-rich secretory proteins, Antigen 5, and Pathogenesis-related 1 protein (CAP) superfamily protein
AT4G26200	ACS7	1.60705	0.00046309	0.317412	0.72767	0.723618	0.687407	1-aminocyclopropane-1-carboxylate synthase 7
AT4G27450	AT4G27450	-0.419113	0.492253	-1.56555	0.0387904	1.56926	0.207044	Aluminum induced protein with YGL and LRDR motifs
AT4G34770	SAUR1	-1.87218	9.38e-07	-2.93337	1.03e-06	0.917737	0.277929	SAUR-like auxin-responsive protein family
AT4G36700	AT4G36700	2.36042	0.000112466	1.16461	0.204983	0.905848	0.707442	RmlC-like cupins superfamily protein
AT5G01740	AT5G01740	1.13798	0.00655692	0.0614626	0.955487	0.552184	0.779583	Nuclear transport factor 2 (NTF2) family protein
AT5G05440	PYL5	-1.92248	7.83e-07	-3.06474	6.7e-07	1.09966	0.164855	Pyrabactin resistance (PYR) 1-like 5
AT5G06320	NHL3	-0.626424	0.0901881	-1.87367	0.00102084	1.34706	0.111139	NDR1/HIN1-like 3
AT5G09570	AT5G09570	-0.360759	0.439121	-1.44766	0.0147462	0.157406	0.968147	Cox19-like CHCH family protein
AT5G13190	AT5G13190	-0.0931967	0.790394	-1.14711	0.00216699	0.700481	0.255202	GSH-induced LITAF domain protein
AT5G14730	AT5G14730	-1.54988	7.33e-08	-2.45768	6.82e-08	1.01794	0.0378871	Hypothetical protein
AT5G15120	POC1	1.10299	0.00484614	-0.291725	0.71339	0.850319	0.498324	2-aminoethanethiol dioxygenase, putative
AT5G15160	BNQ2	-1.41215	7.73e-06	-2.4321	2.36e-06	0.494517	0.641388	Basic helix-loop-helix protein 134
AT5G16200	AT5G16200	-0.474803	0.0679459	-1.7778	4.31e-05	0.858816	0.164855	50S ribosomal protein-like protein
AT5G18430	AT5G18430	-0.381913	0.154957	-1.51578	0.000259431	0.929379	0.119627	GDSL-motif esterase/acyltransferase/lipase
AT5G19120	AT5G19120	-0.334749	0.292278	-1.68314	0.00026872	1.63353	0.00661919	Eukaryotic aspartyl protease family protein
AT5G19240	AT5G19240	-1.52395	0.00016958	-2.83575	2.25e-05	1.44531	0.111139	Glycoprotein membrane precursor GPI-anchored
AT5G20230	BCB	-2.02897	0.0132764	-3.51036	0.00570406	1.87374	0.471972	Blue copper binding protein
AT5G20740	AT5G20740	-0.218141	0.648379	-1.31109	0.0163106	0.4697	0.779583	Plant invertase/pectin methylesterase inhibitor superfamily protein
AT5G22410	RHS18	1.63792	0.00983573	0.370161	0.785679	1.23524	0.575089	Root hair specific 18
AT5G22920	AT5G22920	-0.498267	0.178612	-1.56667	0.00362287	1.19979	0.147558	CHY-type/CTCHY-type/RING-type Zinc finger protein
AT5G24210	AT5G24210	-0.318275	0.460082	-1.73285	0.0019773	1.13268	0.204264	Alpha/beta-hydrolases superfamily protein
AT5G24313	AT5G24313	1.03754	0.00985151	-0.101846	0.918703	0.712069	0.633489	Transmembrane protein
AT5G24590	TIP	-0.282061	0.339631	-1.33918	0.0010311	0.62539	0.423263	TCV-interacting protein
AT5G39520	AT5G39520	1.27109	0.00196783	0.140545	0.884903	0.661964	0.687614	Hypothetical protein
AT5G42600	MRN1	1.63615	0.0109371	0.472959	0.717894	0.875285	0.770282	Oxidosqualene synthase
AT5G43170	AZF3	0.190953	0.621009	-1.10445	0.0139001	0.766071	0.359074	Cys2/His2-type zinc finger protein 3
AT5G47220	ERF2	-0.148959	0.741338	-1.39069	0.00469595	0.943142	0.244225	Ethylene responsive element binding factor 2 (ERF2)
AT5G49448	CPuORF4	-0.185346	0.736706	-1.30637	0.0273408	1.34161	0.150836	Putative protein contains similarity to bZIP transcription factor
AT5G57560	TCH4	-0.157781	0.824534	-1.65706	0.0216945	1.84623	0.0917645	Xyloglucan endotransglucosylase/hydrolase 22
AT5G58390	AT5G58390	-0.46924	0.237566	-1.83518	0.00130345	0.772497	0.50797	Peroxidase superfamily protein
AT5G58570	AT5G58570	0.183155	0.735272	-1.21953	0.0364178	0.562658	0.729722	Transmembrane protein
AT5G59080	AT5G59080	-1.57664	4.54e-05	-2.65831	2.02e-05	1.3824	0.0999612	Hypothetical protein
AT5G61440	ACHT5	0.0858657	0.800495	-1.73121	1.61e-05	1.36914	0.00513412	Atypical Cys-His-rich thioredoxin 5
AT5G61600	ERF104	0.583124	0.409391	-1.87016	0.0404795	2.03642	0.158889	A member of the ERF (ethylene response factor) subfamily B-3 of ERF/AP2 transcription factor family
AT5G64120	PRX71	-1.0788	0.199375	-2.55032	0.0316265	1.11749	0.743402	Peroxidase 71
AT5G64260	EXL2	-0.0405265	0.950671	-1.15472	0.0352142	0.967431	0.329328	Exordium like 2
AT5G67060	HEC1	-1.06332	0.00485771	-2.66132	3.77e-05	0.814194	0.503924	Basic helix-loop-helix (bHLH) DNA-binding superfamily protein
AT5G67190	DEAR2	0.0264541	0.949554	-1.00906	0.00506138	1.04503	0.0364835	DREB and EAR motif protein 2
ATMG01330	NAD2	-0.524365	0.292397	-2.05556	0.00291415	0.361295	0.906701	NADH-ubiquinone oxidoreductase chain-like protein
[Ca2+]nuc-upregulated
Ensembl ID	Gene Name	logFC.(NLSABA/NLS)	adj.P.Val.	logFC.(WTABA/WT)	adj.P.Val.	logFC.(NLSABA/WTABA)	adj.P.Val.	Target.Description
AT1G07050	AT1G07050	-1.25323	0.0152982	-0.100306	0.945008	-0.737836	0.999997	CCT motif family protein
AT1G15040	AT1G15040	-1.46849	0.0020343	-0.391413	0.695971	0.062628	0.999997	Glutamine amidotransferase class-I
AT1G21100	IGMT1	-2.17977	1.6307e-05	-1.13594	0.121417	0.0733674	0.999997	Indole glucosinolate O-methyltransferase
AT2G01530	MLP329	-1.53857	0.0166766	-0.537562	0.704914	-0.0774784	0.999997	MLP-like protein 329
AT2G14610	PR1	-2.95993	0.0018629	-1.2262	0.490329	-0.108322	0.999997	Pathogenesis-related gene 1
AT2G18660	PNP-A	-1.93872	0.0438778	-0.881589	0.676313	0.0513413	0.999997	Plant natriuretic peptide A
AT2G26020	PDF1.2b	-3.23269	0.00770327	-1.19042	0.639338	0.13537	0.999997	Plant defensin 1.2b
AT2G26560	PLA2A	-2.04937	0.00157378	-0.939556	0.4234	-0.280041	0.999997	Phospholipase A 2A
AT3G49620	DIN11	-1.67719	0.0133844	-0.40612	0.800658	-0.174849	0.999997	Dark inducible 11
AT4G15210	BAM5	-3.76598	0.000601732	-2.6442	0.129981	-0.0564914	0.999997	Beta-amylase 5
AT4G30290	XTH19	0.376729	0.318488	1.46362	0.0187396	-0.381608	0.999997	Xyloglucan endotransglucosylase/hydrolase 19
AT5G43580	UPI	1.06766	0.00172259	2.1278	0.000277327	-0.321897	0.999997	Unusual serine protease inhibitor
AT5G44420	PDF1.2a	-2.61588	0.0418125	-0.551079	0.868039	0.252118	0.999997	Plant defensin 1.2a
AT5G61160	AACT1	-2.41575	0.0218899	-0.920343	0.690371	-0.132898	0.999997	Anthocyanin 5-aromatic acyltransferase 1
[Ca2+]nuc-downregulated
Ensembl ID	Gene Name	logFC.(NLSABA/NLS)	adj.P.Val.	logFC.(WTABA/WT)	adj.P.Val.	logFC.(NLSABA/WTABA)	adj.P.Val.	Target.Description
AT3G11050	FER2	1.02622	0.000151198	-0.0727433	0.911929	0.565646	0.999997	Ferritin 2
AT3G22640	PAP85	1.31359	0.0460074	0.182109	0.91997	1.02898	0.999997	Cupin family protein
AT4G28520	CRU3	2.34298	0.0169554	0.693706	0.758685	1.31601	0.999997	A 12S seed storage protein
AT5G54740	SESA5	1.7212	0.0392102	0.712703	0.700665	1.1035	0.999997	Seed storage albumin 5
[Ca2+]cyt and [Ca2+]nuc-upregulated
Ensembl ID	Gene Name	logFC.(NLSABA/NLS)	adj.P.Val.	logFC.(NESABA/NES)	adj.P.Val.	logFC.(WTABA/WT)	adj.P.Val.	logFC.(NLSABA/WTABA)	adj.P.Val.	logFC.(NESABA/WTABA)	adj.P.Val.	Target.Description
AT1G53590	NTMC2T6.1	0.16923	0.654211	0.00192227	0.997498	1.26421	0.0285958	-0.497983	0.999997	-0.591295	0.707449	Calcium-dependent lipid-binding (CaLB domain) family protein
AT2G02570	AT2G02570	0.265734	0.464091	-0.0277144	0.970027	1.27745	0.0281044	-0.402948	0.999997	-0.688996	0.621804	Nucleic acid binding/RNA binding protein
AT2G16860	AT2G16860	0.264158	0.358112	-0.152665	0.725299	1.28216	0.00688709	-0.574469	0.999997	-1.02982	0.168159	GCIP-interacting family protein
AT2G34180	CIPK13	-1.23453	8.55514e-05	-1.07356	0.000635624	-0.0046825	0.995975	-0.32812	0.999997	-0.453669	0.729722	CBL-interacting protein kinase 13 (CIPK13)
AT3G05890	RCI2B	0.659415	0.127467	0.444077	0.440839	1.96237	0.00774386	-0.443945	0.999997	-0.313314	0.934096	Low temperature and salt responsive protein (LTI6B)
AT3G44735	PSK1	0.599859	0.190596	0.546135	0.349751	1.61766	0.0359711	-0.574175	0.999997	-0.632055	0.800628	Phytosulfokine 3 precursor
AT3G60140	DIN2	2.96179	1.52944e-05	2.79716	4.57e-05	4.05333	0.00012717	-0.288469	0.999997	-0.391164	0.939217	Glycosyl hydrolase superfamily protein
AT4G12280	AT4G12280	0.197779	0.593688	0.40218	0.358844	1.46496	0.0113326	-0.964372	0.999997	-0.970329	0.377493	Copper amine oxidase like protein
AT4G26190	AT4G26190	0.458062	0.0591425	-0.236587	0.471026	1.53005	0.000471682	-0.737455	0.999997	-1.49077	0.0102446	Haloacid dehalogenase-like hydrolase (HAD) superfamily protein
AT4G38280	AT4G38280	0.693445	0.139724	-0.278909	0.696965	1.76076	0.0265633	-0.496844	0.999997	-0.730129	0.756403	Integral membrane hemolysin-III-like protein
AT5G41790	CIP1	1.26415	0.0179084	-0.119073	0.900525	3.03744	0.00109223	-1.03163	0.999997	-2.54598	0.0476695	Myosin heavy chain-like protein
AT5G51620	AT5G51620	0.0441663	0.899132	-0.365882	0.289649	1.10992	0.017685	-0.545592	0.999997	-0.771468	0.395379	Unknown protein
AT5G52280	AT5G52280	1.00993	0.020285	-0.159095	0.824573	2.22746	0.00290782	-0.425505	0.999997	-1.77275	0.116987	Hyaluronan mediated motility receptor-like protein
ATCG00690	PSBT	0.392583	0.454084	-1.03576	0.0654916	1.68662	0.0457079	-0.685002	0.999997	-0.962124	0.645327	PSII T protein
[Ca2+]cyt and [Ca2+]nuc-downregulated
Ensembl ID	Gene Name	logFC.(NLSABA/NLS)	adj.P.Val.	logFC.(NESABA/NES)	adj.P.Val.	logFC.(WTABA/WT)	adj.P.Val.	logFC.(NLSABA/WTABA)	adj.P.Val.	logFC.(NESABA/WTABA)	adj.P.Val.	Target.Description
AT1G43240	AT1G43240	-0.180728	0.5424	0.281696	0.445814	-1.22324	0.00939183	0.407948	0.999997	0.546264	0.629239	Mutator-like transposase family
AT3G55980	SZF1	-1.86954	0.000148582	-0.566428	0.305172	-2.9073	0.000270282	1.34174	0.999997	2.61663	0.013509	Salt-inducible zinc finger 1
