# Supplementary material for: Cytosolic and Nucleosolic Calcium-Regulated Molecular Networks in Response to Long-Term Treatment with Abscisic Acid and Methyl Jasmonate in Arabidopsis thaliana
Source: Genes (Basel). 2022 Mar 16;13(3):524. doi: 10.3390/genes13030524 (PMC8950999; doi:10.3390/genes13030524)
Supplement: Supplementary file 1 [file genes-13-00524-s001.zip › Table S3 Ca-regulated JA responsive genes.xlsx]

## Sheet: Ca-regulated JA responsive
[Ca2+]cyt-upregulated
Ensembl ID	Gene Name	logFC.(NESJA/NES)	adj.P.Val.	logFC.(WTJA/WT)	adj.P.Val.	logFC.(NESJA/WTJA)	adj.P.Val.	Target.Description
AT1G35330	AT1G35330	1.81401	0.000144169	2.93847	0.0001515	-0.971838	0.452196	RING/U-box superfamily protein
AT1G49310	AT1G49310	0.0857838	0.807388	1.41209	0.0034165	-0.376766	0.705332	Transmembrane protein
AT1G53870	AT1G53870	1.37509	3.07366e-05	2.40272	1.21145e-05	0.0372606	0.984574	LURP-one-like protein (DUF567)
AT1G61120	TPS04	0.923933	0.108978	2.12689	0.0253539	-1.45841	0.377032	Geranyllinalool synthase
AT1G61820	BGLU46	1.23035	0.000284891	2.41979	3.01134e-05	-0.494942	0.633816	Beta-glucosidase 46
AT1G79310	MC7	1.0388	0.00243316	2.06587	0.000370106	-0.949107	0.310668	Putative metacaspase
AT2G18050	HIS1-3	0.58953	0.159992	1.83214	0.00800886	-0.509616	0.729588	Histone H1-3
AT2G20210	AT2G20210	0.192727	0.412613	1.19916	0.00137158	-0.63794	0.295357	RNI-like superfamily protein
AT2G23540	AT2G23540	-1.65017	0.000576886	-0.55421	0.514835	-0.374742	0.836312	GDSL-motif esterase/acyltransferase/lipase
AT2G35380	AT2G35380	-1.39162	0.000229048	-0.36489	0.590772	-0.674138	0.521139	Peroxidase superfamily protein
AT2G44010	AT2G44010	0.247835	0.392548	1.30451	0.00432446	-0.497454	0.554835	Hypothetical protein
AT2G44380	AT2G44380	-2.20573	4.69308e-07	-0.769535	0.191563	-0.706507	0.491419	Cysteine/Histidine-rich C1 domain family protein
AT3G01190	AT3G01190	-2.00897	5.18698e-05	-0.865054	0.264085	-0.657288	0.660413	Peroxidase superfamily protein
AT3G04030	AT3G04030	0.258963	0.368715	1.26608	0.00547787	-1.12108	0.133795	Homeodomain-like superfamily protein
AT3G25820	TPS-CIN	-1.88619	0.00132238	-0.57419	0.602465	-0.4427	0.848662	Monoterpene 1,8-cineole synthase
AT3G26440	AT3G26440	0.0293756	0.942363	1.04175	0.0376282	-0.716477	0.413846	Putative transmembrane protein (DUF707)
AT3G45160	AT3G45160	-2.66871	1.88861e-06	-1.54885	0.0423223	-0.469237	0.782465	Putative membrane lipoprotein
AT3G47340	ASN1	1.12741	0.138588	2.47029	0.0477102	-0.256904	0.948638	Glutamine-dependent asparagine synthetase 1
AT4G11080	AT4G11080	-1.10511	0.00697258	-0.0295664	0.977602	-0.814279	0.501462	A protein containing three copies of the HMG
AT4G15660	GRXS8	0.321143	0.561589	1.7791	0.030115	-0.48711	0.791173	Thioredoxin superfamily protein
AT4G23700	CHX17	-1.17724	0.00653832	-0.110428	0.913554	-0.341227	0.844358	Cation/H+ exchanger 17
AT4G35060	AT4G35060	1.32943	0.000559635	2.43477	0.000160362	-0.589687	0.617371	Heavy metal transport/detoxification superfamily protein
AT4G37010	CML19	1.21654	0.00467429	2.3981	0.00092519	-0.68388	0.617847	calmodulin-like protein 19
AT5G06570	AT5G06570	1.16879	0.000620434	2.271	9.19157e-05	-0.670985	0.48401	Alpha/beta-hydrolases superfamily protein
AT5G22555	AT5G22555	1.55257	2.35183e-06	2.55545	1.78297e-06	-0.932589	0.214635	Transmembrane protein
AT5G23840	AT5G23840	5.74635	3.74783e-11	6.74964	9.64698e-09	-0.781736	0.646734	MD-2-related lipid recognition domain-containing protein
AT5G24770	VSP2	3.71825	2.52132e-09	5.05142	4.49379e-08	-0.0558121	0.984522	Vegetative storage protein 2
AT5G26280	AT5G26280	1.82308	4.87076e-06	2.90062	6.09621e-06	-0.17118	0.917156	TRAF-like family protein
AT5G53250	AGP22	-1.07592	0.0482857	-0.0684441	0.959326	-0.677756	0.726785	Arabinogalactan protein 22
AT5G56540	AGP14	-1.49539	0.00262462	-0.0665591	0.955503	-1.0549	0.461151	Arabinogalactan protein (AGP14)
AT5G62340	AT5G62340	-1.41065	2.94598e-05	-0.0359012	0.961097	-0.664115	0.450577	Plant invertase/pectin methylesterase inhibitor superfamily protein
[Ca2+]cyt-downregulated
Ensembl ID	Gene Name	logFC.(NLSJA/NLS)	adj.P.Val.	logFC.(WTJF/WT)	adj.P.Val.	logFC.(NLSJA/WTJA)	adj.P.Val.	Target.Description
AT5G16190	CSLA11	2.21967	3.93826e-10	1.20777	0.00164606	0.523319	0.428422	Cellulose synthase like A11
AT1G49200	AT1G49200	-1.10935	0.00557075	-2.13684	0.00144039	0.878897	0.449989	RING-H2 finger protein RHA3a
AT2G18230	PPA2	-1.12429	0.000531671	-2.15856	8.74266e-05	0.964726	0.246612	Putative inorganic pyrophosphatase
AT5G39890	AT5G39890	-0.125601	0.720203	-1.16473	0.0186011	0.144571	0.921537	Putative 2-aminoethanethiol dioxygenase
AT1G61800	GPT2	3.27232	0.00291085	2.22804	0.228607	0.499262	0.926713	Glucose-6-phosphate/phosphate-translocator 2
AT1G25560	TEM1	0.0387309	0.912145	-1.03017	0.0193321	1.11051	0.130082	A member of the RAV transcription factor family
AT2G25510	AT2G25510	-1.0756	0.0829019	-2.14665	0.0368937	1.15037	0.547989	Transmembrane protein
AT2G21050	LAX2	-0.21752	0.259962	-1.3209	8.35075e-05	1.07071	0.0182833	Like auxin resistant 2
AT5G61600	ERF104	-1.30631	0.0165137	-2.42179	0.00770434	0.698613	0.712607	A member of the ERF (ethylene response factor) subfamily B-3 of ERF/AP2 transcription factor family
AT3G10040	HRA1	-0.152636	0.727237	-1.34135	0.0290914	0.328669	0.817207	Hypoxia response attenuator 1
AT1G66390	MYB90	1.23352	0.0244358	-0.000472541	0.999629	0.611061	0.758825	MYB-related transcription factor
AT1G80440	KMD1	-1.68829	1.42336e-05	-3.0012	4.03783e-06	1.68549	0.0658725	A member of a family of F-box proteins
AT1G68840	RAV2	-1.20052	1.24206e-05	-2.57152	1.97113e-07	1.51311	0.0109237	Part of a complex that has been named `regulator of the (H+)-ATPase of the vacuolar and endosomal membranes' (RAVE)
AT3G26200	CYP71B22	-0.15092	0.75146	-1.55277	0.0193204	0.306892	0.853778	Putative cytochrome P450
AT2G20670	AT2G20670	-1.35501	0.00013871	-2.7605	7.85872e-06	1.71918	0.0405378	Sugar phosphate exchanger, putative
AT2G40000	HSPRO2	-2.03633	4.36511e-05	-3.81641	6.39273e-06	1.91555	0.122566	Ortholog of sugar beet HS1 PRO-1 2
AT3G02550	LBD41	-0.607571	0.397406	-2.84352	0.0110967	0.708908	0.774418	LOB domain-containing protein 41
[Ca2+]nuc-upregulated
Ensembl ID	Gene Name	logFC.(NLSJA/JA)	adj.P.Val.	logFC.(WTJA/WT)	adj.P.Val.	logFC.(NLSJA/WTJA)	adj.P.Val.	Target.Description
AT1G08550	NPQ1	-1.16399	0.000134792	-0.0573996	0.932571	-1.20088	0.111816	Non-photochemical quenching 1
AT1G09090	RBOHB	2.3688	3.09e-07	3.57215	9.95e-07	-0.797861	0.367997	NADPH-oxidase AtrbohB
AT1G15340	MBD10	-1.06461	3.33e-05	-0.0171001	0.977104	-0.851572	0.152369	Methyl-CpG-binding domain 10
AT1G17380	JAZ5	3.82475	2.82e-09	4.86637	1.34e-07	-0.529655	0.660779	Jasmonate-zim-domain protein 5
AT1G19180	JAZ1	1.81226	1.42e-05	2.94196	1.7e-05	-0.745508	0.409627	Jasmonate-zim-domain protein 1
AT1G22740	RAB7	-1.72231	1.06e-09	-0.544641	0.0761882	-0.734721	0.134094	GTP-binding protein
AT1G24320	AT1G24320	1.48951	0.00110213	2.5902	0.00081121	-1.03416	0.34721	Six-hairpin glycosidases superfamily protein
AT1G52410	TSA1	4.21333	1.78e-09	5.37249	8.15e-08	-0.57909	0.651804	TSK-associating protein 1
AT1G64360	SAQR	-1.14297	0.00210502	-0.00691378	0.994122	-0.703994	0.447909	Enescence-associated and QQS-related
AT1G78970	LUP1	-1.31843	1.35e-05	-0.207866	0.702451	-1.21325	0.0975683	Lupeol synthase 1
AT2G02710	PLPB	-1.0851	0.000308694	-0.038372	0.956544	-0.581707	0.410167	PAS/LOV protein B
AT2G14610	PR1	-2.26336	0.0101219	-1.06768	0.537209	0.429722	0.895152	Pathogenesis-related gene 1
AT2G19800	MIOX2	-1.16416	0.00320091	-0.110783	0.906775	-0.270113	0.837426	Myo-inositol oxygenase family gene
AT2G21440	AT2G21440	-1.03839	0.000432205	0.131225	0.834065	-0.94017	0.183763	RNA-binding (RRM/RBD/RNP motifs) family protein
AT2G22560	NET2D	0.0107859	0.975805	1.56868	0.00223265	-1.19589	0.134369	Kinase interacting (KIP1-like) family protein
AT2G33830	DRM2	-1.14572	0.024591	0.398219	0.718522	-1.10691	0.397637	Dormancy/auxin associated family protein
AT2G35950	EDA12	0.0870544	0.672678	1.11143	0.00120559	-0.729103	0.156086	Embryo sac development arrest 12
AT2G37080	RIP3	-1.30582	0.00114769	-0.226164	0.790608	-0.993648	0.309597	ROP interactive partner 3
AT3G15310	AT3G15310	-0.0430224	0.832768	1.22371	0.000211559	-1.03343	0.0317907	Transposable-element_gene
AT3G16000	MFP1	-1.08119	0.00342013	0.683349	0.300802	-1.36337	0.152369	MAR binding filament-like protein 1
AT3G18390	EMB1865	-1.29748	5.27e-05	-0.186257	0.764349	-1.07208	0.152369	CRS1 / YhbY (CRM) domain-containing protein
AT3G49620	DIN11	4.76066	8.82e-08	6.26157	2.17e-06	-0.404697	0.858602	A protein similar to 2-oxoacid-dependent dioxygenase
AT3G50240	KICP-02	-1.4463	0.000150247	-0.172076	0.826647	-0.970376	0.267189	ATP binding microtubule motor family protein
AT3G57710	RKS1	0.0292547	0.925836	1.06141	0.0197464	-0.850925	0.204727	Resistance related kinase 1
AT3G62950	GRXC11	-2.47442	5.67e-05	-1.35888	0.151982	-0.317285	0.868921	Thioredoxin superfamily protein
AT4G10500	AT4G10500	1.24239	4.11e-05	2.51003	2.68e-06	-1.127	0.122826	2-oxoglutarate (2OG) and Fe(II)-dependent oxygenase superfamily protein
AT4G12550	AIR1	3.79552	1.96e-06	5.20803	2.24e-05	-0.441462	0.840442	Auxin-induced in root cultures 1
AT4G13280	TPS12	-0.116103	0.593643	1.21009	0.00109471	-1.14527	0.0476166	Terpenoid synthase 12
AT4G19530	AT4G19530	-1.76816	4.3e-06	-0.395762	0.52136	-1.18676	0.156086	Disease resistance protein (TIR-NBS-LRR class) family
AT4G32190	AT4G32190	-1.34946	0.000127749	-0.264236	0.691292	-0.899661	0.266872	Myosin heavy chain-related protein
AT4G33150	LKR/SDH	0.253448	0.339928	1.66012	0.000537747	-0.983372	0.162997	Lysine-ketoglutarate reductase/saccharopine dehydrogenase
AT4G33740	AT4G33740	-1.01572	0.00438486	0.680704	0.286235	-1.26337	0.169037	MYB-like protein X
AT4G36540	BEE2	-1.89637	3e-06	-0.605185	0.318212	-1.07114	0.200281	BR enhanced expression 2
AT5G06690	WCRKC1	-1.24956	0.000708605	-0.164257	0.836249	-0.907778	0.306163	WCRKC thioredoxin 1
AT5G09530	PRP10	-1.49647	0.000347588	-0.489071	0.515587	-0.857638	0.380256	Proline-rich protein 10
AT5G16030	AT5G16030	-1.39107	3.72e-05	-0.22556	0.720487	-1.00685	0.184445	Mental retardation GTPase activating protein
AT5G20360	AT5G20360	-0.058809	0.852413	1.07811	0.0244182	-0.782284	0.267768	Octicosapeptide/Phox/Bem1p (PB1) domain-containing protein / tetratricopeptide repeat (TPR)-containing protein
AT5G25160	ZFP3	-1.10874	0.000143556	0.251536	0.643186	-1.1616	0.111816	Zinc finger protein 3
AT5G41790	CIP1	-1.19666	0.0190561	0.958876	0.310173	-1.41388	0.279374	COP1-interactive protein 1
AT5G46240	KAT1	-1.69012	3.77e-05	0.262805	0.733803	-1.45142	0.135433	Potassium channel protein (KAT1)
AT5G53880	AT5G53880	-1.59009	1.18e-05	-0.557868	0.322896	-0.719011	0.351798	Hypothetical protein
AT5G55100	AT5G55100	-1.32739	1.72e-05	0.0584649	0.928245	-1.2202	0.0975683	SWAP (Suppressor-of-White-APricot)/surp domain-containing protein
AT5G63420	EMB2746	-1.60033	0.00014238	-0.545559	0.44952	-1.22247	0.203602	Embryo defective 2746
[Ca2+]nuc-downregulated
Ensembl ID	Gene Name	logFC.(NLSJA/NLS)	adj.P.Val.	logFC.(WTJA/WT)	adj.P.Val.	logFC.(NLSJA/WTJA)	adj.P.Val.	Target.Description
AT1G05240	PR9	1.74794	0.000510446	0.605002	0.50573	1.21744	0.309991	Peroxidase superfamily protein
AT1G16730	UP6	1.03383	2.83e-05	-0.140034	0.766256	1.11302	0.0641528	Hypothetical protein
AT2G07708	AT2G07708	-0.152212	0.581444	-1.1661	0.0111768	0.6042	0.36735	Hypothetical protein
AT2G23960	AT2G23960	1.32218	2.04e-06	0.299569	0.485941	0.989947	0.111816	Class I glutamine amidotransferase-like superfamily protein
AT2G34080	AT2G34080	1.5115	1.16e-06	0.466784	0.298826	0.601504	0.335985	Cysteine proteinases superfamily protein
AT2G38240	AT2G38240	1.75006	4.84e-06	0.655628	0.248135	0.848446	0.289567	One of 4 paralogs encoding a 2-oxoglutarate/Fe(II)-dependent oxygenases
AT2G46860	PPA3	1.33378	0.00434724	0.321368	0.748617	1.31849	0.261652	Putative inorganic pyrophosphatase
AT3G12230	SCPL14	1.77231	0.000265234	0.469427	0.601991	1.16131	0.307365	Serine carboxypeptidase-like 14
AT3G21720	ICL	1.56745	0.0127098	0.0388139	0.980746	1.51963	0.342932	Glyoxylate cycle enzyme isocitrate lyase
AT3G23250	MYB15	1.53365	0.00237699	0.43039	0.672393	0.765619	0.559884	Member of the R2R3 factor gene family
AT3G46660	UGT76E12	3.03128	9.48e-09	1.48212	0.0163098	1.50273	0.124644	UDP-glucosyl transferase 76E12
AT3G47480	AT3G47480	1.06205	0.0238675	-0.459356	0.638508	1.45142	0.22823	Calcium-binding EF-hand family protein
AT3G57260	BGL2	2.50589	0.000743227	1.19813	0.353755	1.2132	0.511204	Beta-1,3-glucanase 2 (BG2)
AT4G08770	PRX37	2.27915	1.28e-07	1.06139	0.0527202	1.67758	0.0617511	A putative apoplastic peroxidase Prx37
AT5G02780	GSTL1	-0.348755	0.349191	-1.67418	0.009689	1.17406	0.214878	Glutathione transferase lambda 1
AT5G03860	MLS	1.43208	2.33e-06	0.243945	0.62523	1.12485	0.0975683	Malate synthase-like protein
AT5G22410	RHS18	2.47248	8.29e-05	1.45484	0.135313	1.32007	0.350456	Root hair specific 18
AT5G57530	XTH12	1.45926	0.0247661	0.341898	0.818726	1.22652	0.475634	Xyloglucan endotransglucosylase/hydrolase 12
ATCG00270	PSBD	-1.23075	0.00442216	-2.26214	0.00240553	0.570757	0.634034	PSII D2 protein
[Ca2+]cyt and [Ca2+]nuc-upregulated
Ensembl ID	Gene Name	logFC.(NLSJA/JA)	adj.P.Val.	logFC.(NESJA/NES)	adj.P.Val.	logFC.(WTJA/WT)	adj.P.Val.	logFC.(NLSJA/WTJA)	adj.P.Val.	logFC.(NESJA/WTJA)	adj.P.Val.	Target.Description
AT1G21100	IGMT1	3.16766	4.82e-08	3.41593	1.49923e-08	4.60139	2.41473e-07	-0.316541	0.81904	-0.426154	0.789853	O-methyltransferase family protein
AT1G28400	AT1G28400	-1.04846	0.000917248	-1.31816	0.000110868	0.0746523	0.91964	-0.434175	0.597479	-0.43356	0.68261	GATA zinc finger protein
AT1G54410	HIRD11	-1.19861	8.75e-06	-1.26163	5.4126e-06	0.0198914	0.97349	-0.986903	0.111816	-1.21955	0.0458092	KS-type dehydrin
AT1G60450	GOLS7	3.12355	1.05e-07	3.47906	2.12448e-08	4.75297	2.66557e-07	-1.48988	0.180601	-0.956229	0.47163	Galactinol synthase
AT1G60470	GOLS4	1.30451	0.00176864	1.32821	0.00199692	3.01685	6.31814e-05	-1.21498	0.231864	-0.921791	0.452825	Galactinol synthase
AT1G68790	LINC3	-1.58425	3.48e-05	-1.23514	0.000688968	0.554482	0.36946	-1.59211	0.0975683	-1.37108	0.147425	Putative nuclear matrix constituent protein 1 (NMCP1)
AT2G01520	MLP328	-3.50125	0.000377146	-3.29525	0.000882099	-1.44547	0.397094	-0.895782	0.751903	0.120015	0.984574	MLP-like protein 328
AT2G05540	AT2G05540	-1.38153	0.00592972	-1.30073	0.0118867	0.0800865	0.950512	-1.08075	0.390833	-0.950032	0.548767	Glycine-rich protein family
AT2G21560	AT2G21560	0.381239	0.234964	0.577592	0.0890192	1.59548	0.00515239	-0.765558	0.353486	-0.873774	0.369419	Nucleolar-like protein
AT2G33790	AGP30	-1.83435	0.000439538	-2.4603	1.93617e-05	-0.357741	0.732627	-0.771399	0.554279	-0.845551	0.60146	Arabinogalactan protein 30
AT2G36650	AT2G36650	1.37198	0.000546364	1.24339	0.00177477	2.42817	0.000304163	-0.925446	0.326694	-1.02016	0.356151	CHUP1-like protein
AT2G42760	AT2G42760	1.51927	1.88e-05	1.29689	0.00015825	2.53864	1.5625e-05	-0.827185	0.283681	-1.06218	0.216916	DUF1685 family protein
AT3G01260	AT3G01260	-1.10604	0.000432205	-1.33448	7.17751e-05	-0.0745963	0.917642	-0.207948	0.834084	-0.16554	0.909602	Galactose mutarotase-like superfamily protein
AT3G05900	AT3G05900	-1.4943	0.00104785	-1.08838	0.0156723	0.55371	0.510574	-1.56484	0.169037	-1.32064	0.286176	Neurofilament protein-like protein
AT3G07274	AT3G07274	-0.131427	0.661332	0.0512828	0.892802	1.16201	0.0170835	-1.14612	0.135433	-1.06267	0.178162	Unknown protein
AT3G19370	AT3G19370	-1.58661	0.000140196	-1.11576	0.00491866	0.357642	0.644307	-1.21848	0.200658	-0.791884	0.494932	Filament-like protein (DUF869)
AT3G48360	BT2	-2.15798	3.39e-05	-2.45211	8.15424e-06	-1.03995	0.195263	-0.315449	0.838755	-0.527825	0.756801	BTB and TAZ domain protein 2
AT3G59930	AT3G59930	2.58991	8.41e-05	3.45679	2.47096e-06	4.57983	3.71908e-05	-0.585095	0.746479	-0.251565	0.935014	Defensin-like (DEFL) family protein
AT4G04840	MSRB6	1.15633	0.00913803	1.24298	0.00728333	2.2484	0.00354885	-0.503874	0.69922	-0.7224	0.631087	Methionine sulfoxide reductase B6
AT4G07820	AT4G07820	0.522692	0.465371	0.710383	0.360427	3.1835	0.00923406	-1.84917	0.306407	-1.44133	0.51611	CAP (Cysteine-rich secretory proteins, Antigen 5, and Pathogenesis-related 1 protein) superfamily protein
AT4G14760	AT4G14760	-0.397195	0.209174	0.00382862	0.99295	1.16412	0.0360815	-1.16298	0.16948	-0.725856	0.467755	kinase interacting (KIP1-like) family protein
AT4G35770	SEN1	-3.54632	5.51e-05	-2.31926	0.00456896	-1.10578	0.452616	-1.40791	0.48711	-0.428657	0.913053	Senescence-associated protein (SEN1)
AT4G37940	AGL21	0.614699	0.0677703	0.243558	0.53797	1.68021	0.00512858	-0.691016	0.437559	-1.16077	0.233557	MADS-box protein AGL17-like protein
AT5G40450	AT5G40450	-1.3714	0.00049493	-1.29617	0.00110151	0.688142	0.306137	-1.393	0.152369	-1.64034	0.122566	A-kinase anchor-like protein
AT5G46890	AT5G46890	-1.53476	0.0101611	-2.09024	0.00117126	-0.395396	0.763099	-0.438065	0.827007	-0.472395	0.854187	Bifunctional inhibitor/lipid-transfer protein/seed storage 2S albumin superfamily protein
AT5G47740	AT5G47740	1.088	0.00161873	0.483996	0.165267	2.09834	0.000437877	-0.74157	0.375902	-1.29314	0.16481	Adenine nucleotide alpha hydrolases-like superfamily protein
AT5G51850	AT5G51850	0.0270092	0.929335	0.0321679	0.927794	1.13575	0.0104384	-0.874906	0.188174	-0.818762	0.260994	Hypothetical protein
AT5G52280	AT5G52280	-1.10362	0.0089248	-1.17416	0.00765691	0.68048	0.38513	-0.99208	0.350513	-1.24084	0.310668	Hyaluronan mediated motility receptor-like protein
AT5G53020	AT5G53020	-0.149505	0.712508	0.104526	0.830374	1.35007	0.0378636	-1.19174	0.213898	-1.1577	0.284007	Ribonuclease P protein subunit P38-like protein
[Ca2+]cyt and [Ca2+]nuc-downregulated
Ensembl ID	Gene Name	logFC.(NLSJA/NES)	adj.P.Val.	logFC.(NESJA/NES)	adj.P.Val.	logFC.(WTJA/WT)	adj.P.Val.	logFC.(NLSJA/WTJA)	adj.P.Val.	logFC.(NESJA/WTJA)	adj.P.Val.	Target.Description
AT1G10370	ERD9	-0.25705	0.2721	-0.448155	0.068523	-1.45034	0.000641272	0.87257	0.163013	1.03787	0.130082	Glutathione S-transferase U17
AT1G69880	TH8	1.25899	0.0160033	1.233	0.0234906	-0.846754	0.38858	2.07943	0.148792	1.20053	0.4558	Thioredoxin H-type 8
AT1G69930	GSTU11	2.09928	4.38e-06	2.06786	6.57432e-06	1.0237	0.116122	1.00645	0.291693	0.769298	0.512191	Glutathione transferase TAU11
AT2G44460	BGLU28	1.98755	0.000261204	2.56666	1.58759e-05	0.74482	0.429009	0.892676	0.494939	1.03917	0.5015	Beta-glucosidase 28
AT5G67110	ALC	0.113678	0.534544	0.193288	0.319471	-1.20544	0.000213589	1.14338	0.0225612	1.1497	0.0109237	A myc/bHLH transcription factor-like protein
