# Supplementary material for: Cytosolic and Nucleosolic Calcium-Regulated Molecular Networks in Response to Long-Term Treatment with Abscisic Acid and Methyl Jasmonate in Arabidopsis thaliana
Source: Genes (Basel). 2022 Mar 16;13(3):524. doi: 10.3390/genes13030524 (PMC8950999; doi:10.3390/genes13030524)
Supplement: Supplementary file 1 [file genes-13-00524-s001.zip › Table S5 Calcium signal-decoding proteins.xlsx]

## Sheet: Ca signaling decoding proteins
Table S5. Calcium signal-decoding proteins.
AGI ID	Gene	Identity
AT4G17615	CBL1	CALCINEURIN B-LIKE PROTEIN 1
AT5G55990	CBL2	CALCINEURIN B-LIKE PROTEIN 2
AT4G26570	CBL3	CALCINEURIN B-LIKE PROTEIN 3
AT5G24270	SOS3	CALCINEURIN B-LIKE PROTEIN 4
AT4G01420	CBL5	CALCINEURIN B-LIKE PROTEIN 5
AT4G16350	CBL6	CALCINEURIN B-LIKE PROTEIN 6
AT5G47100	CBL9	CALCINEURIN B-LIKE PROTEIN 9
AT4G33000	CBL10	CALCINEURIN B-LIKE PROTEIN 10
AT4G26560	CBL7	CALCINEURIN B-LIKE PROTEIN 7
AT1G64480	CBL8	CALCINEURIN B-LIKE PROTEIN 8
AT4G30960	CIPK6	CBL-interacting protein kinase 6
AT2G30360	CIPK11	CBL-interacting protein kinase 11
AT4G18700	CIPK12	CBL-interacting protein kinase 12
AT5G01820	CIPK14	CBL-interacting protein kinase 14
AT1G30270	CIPK23	CBL-interacting protein kinase 23
AT5G35410	SOS2	CBL-interacting protein kinase 24
AT3G23000	CIPK7	CBL-interacting protein kinase 7
AT1G01140	CIPK9	CBL-interacting protein kinase 9
AT5G58380	CIPK10	CBL-interacting protein kinase 10
AT2G34180	CIPK13	CBL-interacting protein kinase 13
AT2G38490	CIPK22	CBL-interacting protein kinase 22
AT5G25110	CIPK25	CBL-interacting protein kinase 25
AT5G07070	CIPK2	CBL-interacting protein kinase 2
AT2G25090	CIPK16	CBL-interacting protein kinase 16
AT3G17510	CIPK1	CBL-interacting protein kinase 1
AT2G26980	CIPK3	CBL-interacting protein kinase 3
AT4G14580	CIPK4	CBL-interacting protein kinase 4
AT5G10930	CIPK5	CBL-interacting protein kinase 5
AT4G24400	CIPK8	CBL-interacting protein kinase 8
AT5G01810	CIPK15	CBL-interacting protein kinase 15
AT1G48260	CIPK17	CBL-interacting protein kinase 17
AT1G29230	CIPK18	CBL-interacting protein kinase 18
AT5G45810	CIPK19	CBL-interacting protein kinase 19
AT5G45820	CIPK20	CBL-interacting protein kinase 20
AT5G57630	CIPK21	CBL-interacting protein kinase 21
AT5G04870	CPK1	Calcium-dependent protein kinase
AT5G12480	CPK7	Calcium-dependent protein kinase
AT2G41860	CPK14	Calcium-dependent protein kinase
AT4G21940	CPK15	Calcium-dependent protein kinase
AT4G38230	CPK26	Calcium-dependent protein kinase
AT1G74740	CPK30	Calcium-dependent protein kinase
AT1G18890	CPK10	Calcium-dependent protein kinase
AT4G04700	CPK27	Calcium-dependent protein kinase
AT3G57530	CPK32	Calcium-dependent protein kinase
AT4G23650	CPK3	Calcium-dependent protein kinase
AT4G09570	CPK4	Calcium-dependent protein kinase
AT1G35670	CPK11	Calcium-dependent protein kinase
AT2G38910	CPK20	Calcium-dependent protein kinase
AT3G10660	CPK2	Calcium-dependent protein kinase
AT4G35310	CPK5	Calcium-dependent protein kinase
AT2G17290	CPK6	Calcium-dependent protein kinase
AT5G19450	CPK8	Calcium-dependent protein kinase
AT3G20410	CPK9	Calcium-dependent protein kinase
AT5G23580	CPK12	Calcium-dependent protein kinase
AT3G51850	CPK13	Calcium-dependent protein kinase
AT2G17890	CPK16	Calcium-dependent protein kinase
AT5G12180	CPK17	Calcium-dependent protein kinase
AT4G36070	CPK18	Calcium-dependent protein kinase
AT1G61950	CPK19	Calcium-dependent protein kinase
AT4G04720	CPK21	Calcium-dependent protein kinase
AT4G04710	CPK22	Calcium-dependent protein kinase
AT4G04740	CPK23	Calcium-dependent protein kinase
AT2G31500	CPK24	Calcium-dependent protein kinase
AT2G35890	CPK25	Calcium-dependent protein kinase
AT5G66210	CPK28	Calcium-dependent protein kinase
AT1G76040	CPK29	Calcium-dependent protein kinase
AT4G04695	CPK31	Calcium-dependent protein kinase
AT1G50700	CPK33	Calcium-dependent protein kinase
AT5G19360	CPK34	Calcium-dependent protein kinase
AT3G19100	CRK2	CDPK-related kinase 2
AT2G46700	CRK3	CDPK-related kinase 3
AT3G56760	CRK7	CDPK-related kinase 7
AT2G41140	CRK1	CDPK-related kinase 1
AT5G24430	CRK4	CDPK-related kinase 4
AT3G50530	CRK5	CDPK-related kinase 5
AT3G49370	CRK6	CDPK-related kinase 6
AT1G49580	CRK8	CDPK-related kinase 8
AT5G37780	CaM1	Calmodulin 1
AT2G41110	CAM2	Calmodulin 2
AT3G56800	CAM3	Calmodulin 3
AT1G66410	CAM4	Calmodulin 4
AT2G27030	CAM5	Calmodulin 5
AT3G43810	CAM7	Calmodulin 6
AT2G36910	ABCB1	Calmodulin binding protein
AT3G63380	ACA.j	Calmodulin binding protein
AT4G37640	ACA2	Calmodulin binding protein
AT5G02490	AT5G02490	Calmodulin binding protein
AT1G56410	ERD2	Calmodulin binding protein
AT5G02500	HSC70-1	Calmodulin binding protein
AT3G59220	PRN	Calmodulin binding protein
AT5G56360	PSL4	Calmodulin binding protein
AT5G20810	SAUR.b	Calmodulin binding protein
AT1G22070	TGA3.a	Calmodulin binding protein
AT5G65930	ZWI	Calmodulin binding protein
AT5G40190	Hypothetical.a	Calmodulin binding protein
AT3G25230	ROF1	Calmodulin binding protein
AT5G65210	TGA1	Calmodulin binding protein
AT5G63870	PP7	Calmodulin binding protein
AT5G53010	ACA.i	Calmodulin binding protein
AT3G22910	ACA.k	Calmodulin binding protein
AT1G13210	ACA.l	Calmodulin binding protein
AT1G27770	ACA1	Calmodulin binding protein
AT4G29900	ACA10	Calmodulin binding protein
AT3G57330	ACA11	Calmodulin binding protein
AT2G41560	ACA4	Calmodulin binding protein
AT2G22960	ACA7	Calmodulin binding protein
AT5G57110	ACA8	Calmodulin binding protein
AT3G21180	ACA9	Calmodulin binding protein
AT5G62570	ACBP60-like.a	Calmodulin binding protein
AT5G57580	ACBP60-like.b	Calmodulin binding protein
AT2G18750	ACBP60-like.c	Calmodulin binding protein
AT4G25800	ACBP60-like.d	Calmodulin binding protein
AT2G24300	ACBP60-like.e	Calmodulin binding protein
AT4G31000	ACBP60-like.f	Calmodulin binding protein
AT3G09440	AT3G09440	Calmodulin binding protein
AT3G04080	ATAPY1	Calmodulin binding protein
AT3G49050	CB-HSP.a	Calmodulin binding protein
AT4G00500	CB-HSP.b	Calmodulin binding protein
AT5G37710	CB-HSP.c	Calmodulin binding protein
AT5G26920	CBP60G	Calmodulin binding protein
AT3G56690	CIP111	Calmodulin binding protein
AT5G20720	CPN20	Calmodulin binding protein
AT1G10130	ECA3	Calmodulin binding protein
AT5G60390	EF-1alpha.a	Calmodulin binding protein
AT1G07920	EF-1alpha.b	Calmodulin binding protein
AT1G07930	EF-1alpha.c	Calmodulin binding protein
AT1G07940	EF-1alpha.d	Calmodulin binding protein
AT5G09410	EICBP.B	Calmodulin binding protein
AT5G64220	EICBP.c	Calmodulin binding protein
AT1G67310	EICBP.d	Calmodulin binding protein
AT3G16940	EICBP.e	Calmodulin binding protein
AT4G16150	EICBP.f	Calmodulin binding protein
AT1G02780	EMB2386	Calmodulin binding protein
AT5G17330	GAD	Calmodulin binding protein
AT1G65960	GAD2	Calmodulin binding protein
AT2G02000	GAD3	Calmodulin binding protein
AT2G02010	GAD4	Calmodulin binding protein
AT3G17760	GAD5	Calmodulin binding protein
AT1G08110	Glyoxalase	Calmodulin binding protein
AT3G12580	HSP70	Calmodulin binding protein
AT1G16030	Hsp70b	Calmodulin binding protein
AT5G04020	Hypothetical	Calmodulin binding protein
AT2G38800	Hypothetical	Calmodulin binding protein
AT3G25030	Hypothetical.a	Calmodulin binding protein
AT4G13100	Hypothetical.b	Calmodulin binding protein
AT3G28140	Hypothetical.b	Calmodulin binding protein
AT2G43040	NPG1	Calmodulin binding protein
AT1G27460	NPGR1	Calmodulin binding protein
AT4G28600	NPGR2	Calmodulin binding protein
AT3G59260	Pirin-like.c	Calmodulin binding protein
AT1G50590	Pirin-like.d	Calmodulin binding protein
AT5G64040	PSAN	Calmodulin binding protein
AT3G16780	RibosomalL19.a	Calmodulin binding protein
AT4G02230	RibosomalL19.b	Calmodulin binding protein
AT5G48570	ROF2	Calmodulin binding protein
AT3G43120	SAUR.a	Calmodulin binding protein
AT4G31320	SAUR.c	Calmodulin binding protein
AT2G24400	SAUR.d	Calmodulin binding protein
AT4G34750	SAUR49	Calmodulin binding protein
AT2G22300	SR1	Calmodulin binding protein
AT1G77920	TGA3-like.b	Calmodulin binding protein
AT5G10030	TGA4	Calmodulin binding protein
AT4G01010	CNGC13	Calmodulin binding protein/Cyclic nucleotide gated ion channel
AT2G24610	CNGC14	Calmodulin binding protein/Cyclic nucleotide gated ion channel
AT4G30360	CNGC17	Calmodulin binding protein/Cyclic nucleotide gated ion channel
AT3G17690	CNGC19	Calmodulin binding protein/Cyclic nucleotide gated ion channel
AT5G57940	CNGC5	Calmodulin binding protein/Cyclic nucleotide gated ion channel
AT2G23980	CNGC6	Calmodulin binding protein/Cyclic nucleotide gated ion channel
AT4G30560	CNGC9	Calmodulin binding protein/Cyclic nucleotide gated ion channel
AT5G53130	CNGC1	Calmodulin binding protein/Cyclic nucleotide gated ion channel
AT1G01340	CNGC10	Calmodulin binding protein/Cyclic nucleotide gated ion channel
AT2G46440	CNGC11	Calmodulin binding protein/Cyclic nucleotide gated ion channel
AT2G46450	CNGC12	Calmodulin binding protein/Cyclic nucleotide gated ion channel
AT2G28260	CNGC15	Calmodulin binding protein/Cyclic nucleotide gated ion channel
AT3G48010	CNGC16	Calmodulin binding protein/Cyclic nucleotide gated ion channel
AT5G14870	CNGC18	Calmodulin binding protein/Cyclic nucleotide gated ion channel
AT5G15410	CNGC2	Calmodulin binding protein/Cyclic nucleotide gated ion channel
AT3G17700	CNGC20	Calmodulin binding protein/Cyclic nucleotide gated ion channel
AT2G46430	CNGC3	Calmodulin binding protein/Cyclic nucleotide gated ion channel
AT5G54250	CNGC4	Calmodulin binding protein/Cyclic nucleotide gated ion channel
AT1G15990	CNGC7	Calmodulin binding protein/Cyclic nucleotide gated ion channel
AT1G19780	CNGC8	Calmodulin binding protein/Cyclic nucleotide gated ion channel
AT4G12860	UNE14	CALMODULIN LIKE 2
AT3G07490	AGD11	CALMODULIN LIKE 3
AT2G43290	MSS3	CALMODULIN LIKE 5
AT4G03290	CML6	CALMODULIN LIKE 6
AT1G05990	RHS2	CALMODULIN LIKE 7
AT4G14640	CML8	CALMODULIN LIKE 8
AT3G51920	CML9	CALMODULIN LIKE 9
AT2G41090	CML10	CALMODULIN LIKE 10
AT3G22930	CML11	CALMODULIN LIKE 11
AT2G41100	CML12	CALMODULIN LIKE 12
AT1G12310	CML13	CALMODULIN LIKE 13
AT1G62820	CML14	CALMODULIN LIKE 14
AT1G18530	CML15	CALMODULIN LIKE 15
AT3G25600	CML16	CALMODULIN LIKE 16
AT1G32250	CML17	CALMODULIN LIKE 17
AT3G03000	CML18	CALMODULIN LIKE 18
AT4G37010	CML19	CALMODULIN LIKE 19
AT3G50360	CML20	CALMODULIN LIKE 20
AT1G66400	CML23	CALMODULIN LIKE 23
AT5G37770	TCH2	CALMODULIN LIKE 24
AT2G36180	CML31	CALMODULIN LIKE 31
AT5G17470	CML32	CALMODULIN LIKE 32
AT3G03400	CML33	CALMODULIN LIKE 33
AT3G03410	CML34	CALMODULIN LIKE 34
AT1G76650	CML38	CALMODULIN LIKE 38
AT1G76640	CML39	CALMODULIN LIKE 39
AT3G50770	CML41	CALMODULIN LIKE 41
AT1G21550	CML44	CALMODULIN LIKE 44
AT5G39670	CML46	CALMODULIN LIKE 46
AT1G24620	CML25	CALMODULIN LIKE 25
AT1G73630	CML26	CALMODULIN LIKE 26
AT1G18210	CML27	CALMODULIN LIKE 27
AT2G41410	CML35	CALMODULIN LIKE 35
AT4G20780	CML42	CALMODULIN LIKE 42
AT5G44460	CML43	CALMODULIN LIKE 43
AT5G04170	CML50	CALMODULIN LIKE 50
AT3G59450	CML1	CALMODULIN LIKE 1
AT3G59440	CML4	CALMODULIN LIKE 4
AT4G26470	CML21	CALMODULIN LIKE 21
AT3G24110	CML22	CALMODULIN LIKE 22
AT3G03430	CML28	CALMODULIN LIKE 28
AT5G17480	APC1	CALMODULIN LIKE 29
AT2G15680	CML30	CALMODULIN LIKE 30
AT3G10190	CML36	CALMODULIN LIKE 36
AT5G42380	CML37	CALMODULIN LIKE 37
AT3G01830	CML40	CALMODULIN LIKE 40
AT3G29000	CML45	CALMODULIN LIKE 45
AT3G47480	CML47	CALMODULIN LIKE 47
AT2G27480	CML48	CALMODULIN LIKE 48
AT3G10300	CML49	CALMODULIN LIKE 49
Total	232
