# Supplementary material for: Cytosolic and Nucleosolic Calcium-Regulated Molecular Networks in Response to Long-Term Treatment with Abscisic Acid and Methyl Jasmonate in Arabidopsis thaliana
Source: Genes (Basel). 2022 Mar 16;13(3):524. doi: 10.3390/genes13030524 (PMC8950999; doi:10.3390/genes13030524)
Supplement: Supplementary file 1 [file genes-13-00524-s001.zip › Table S6 Hormone signaling pathway proteins.xlsx]

## Sheet: ABA pathway proteins
Table S6. Hormone signalling pathway proteins.
AGI ID	Gene Name	Decriptions
AT2G13540	ABH1	Encodes a nuclear cap-binding protein that forms a heterodimeric complex with CBP20 and is involved in ABA signaling and flowering.
AT4G26080	ABI1	Negative regulation of abscisic acid-activated signaling pathway
AT5G57050	ABI2	Encodes a protein phosphatase 2C and negative regulation of abscisic acid-activated signaling pathway
AT3G24650	ABI3	ABI3 protein binds to the highly conserved RY motif [DNA motif CATGCA(TG)],and the B3 domains of this transcription factor is necessary for the specific interaction with the RY element.
AT2G36270	ABI5	Encodes a member of the basic leucine zipper transcription factor family, involved in ABA signalling during seed maturation and germination.
AT5G13680	ABO1	A subunit of Elongator, a histone acetyl transferase complex, responsible for the narrow leaf phenotype in elongata mutants and for reduced root growth
AT2G30020	AT2G30020	Encodes AP2C1. Belongs to the clade B of the PP2C-superfamily.
AT4G21670	AT4G21670	Encodes a a novel transcriptional repressor harboring two double-stranded RNA-binding domains. Response to salt stress and wounding.
AT1G18080	ATARCA	Encodes the Arabidopsis thaliana homolog of the tobacco WD-40 repeat ArcA gene.
AT1G35670	ATCDPK2	Encodes a Ca(2+)-dependent, calmodulin-independent protein kinase that is rapidly induced by drought and high-salt stress but not by low-temperature stress or heat stress.
AT2G43790	ATMPK6	Encodes a MAP kinase induced by pathogens, ethylene biosynthesis, oxidative stress and osmotic stress.Also involved in ovule development.
AT1G04120	ATMRP5	Encodes a high-affinity inositol hexakisphosphate transporter that plays a role in guard cell signaling and phytate storage.
AT5G47100	CBL9	CBL9 interacts with and targets CIPK23 to the plasma membrane in vivo.
AT5G44200	CBP20	Encodes a nuclear cap-binding protein that forms a heterodimeric complex with ABH1 (ATCBP80) and is likely to participate in RNA metabolism.
AT4G23650	CDPK6	Encodes calcium dependent protein kinase 3 (CPK3), a member of the Arabidopsis CDPK gene family
AT1G51500	CER5	Encodes an ABC transporter involved in cuticular wax biosynthesis.
AT2G39940	COI1	Encodes a protein containing Leu-rich repeats and a degenerate F-box motif and is involved in SCF-dependent proteasomal ubiquitin-dependent protein catabolic process
AT4G09570	CPK4	Encodes a member of Calcium Dependent Protein Kinase (CDPK) gene family. Phosphorylates ABA responsive transcription factors ABF1 and ABF4.
AT2G17290	CPK6	Encodes calcium dependent protein kinase 6 (CPK6) functioning in guard cell ion channel regulation. ABA and Ca(2+) activation of slow-type anion channels
AT5G03730	CTR1	Homologous to the RAF family of serine/threonine protein kinases,Negative regulator in the ethylene signal transduction pathway.
AT2G29090	CYP707A2	Encodes a protein with ABA 8'-hydroxylase activity, involved in ABA catabolism that predominantly accumulates in dry seeds.
AT5G45340	CYP707A3	Encodes a protein with ABA 8'-hydroxylase activity; involved in ABA catabolism and postgermination growth
AT2G38050	DET2	Similar to mammalian steroid-5-alpha-reductase. Involved in the brassinolide biosynthetic pathway.
AT5G03280	EIN2	Involved in ethylene signal transduction. Acts downstream of CTR1.
AT1G08920	ESL1	Encodes ESL1, a transporter for monosaccharides.
AT1G06390	GSK1	Encodes a GSK3/shaggy-like protein kinase which response to osmotic stress and interact with the BZR1 protein involved in brassinosteroid-mediated signaling in a Y2H assay and promotes BZR1 phosphorylation in protoplasts.
AT1G72770	HAB1	Mutant has ABA hypersensitive inhibition of seed germination
AT5G20270	HHP1	Meptahelical transmembrane protein homologous to human adiponectin receptors and progestin receptors involved in negative regulation of abscisic acid-activated signaling pathway and response to hormone,salt stress and sucrose.
AT4G36830	HOS3-1	GNS1/SUR4 membrane protein family. It has fatty acid elongase activity
AT1G09700	HYL1	Encodes a nuclear dsRNA binding protein. Involved in mRNA cleavage.
AT3G23050	IAA7	Transcription regulator acting as repressor of auxin-inducible gene expression.
AT5G01540	LECRKA4.1	a member of the lectin receptor kinase subfamily A4. Functions redundantly in the negative regulation of ABA response in seed germination.
AT5G01550	LECRKA4.2	a member of the lectin receptor kinase subfamily A4. functions redundantly in the negative regulation of ABA response in seed germination.
AT3G63210	MARD1	encodes a novel zinc-finger protein with a proline-rich N-terminus, identical to senescence-associated protein SAG102
AT4G26070	MEK1	Member of MAP Kinase Kinase. Likely functions in a stress-activated MAPK pathway. Can phosphorylate the MAPK AtMPK4, in response to stress. Gets phosphorylated by MEKK1 in response to wounding.
AT5G58230	MSI1	Encodes a WD-40 repeat containing protein that functions in chromatin assembly as part of the CAF1 and FIE complex.
AT1G32640	MYC2	Encodes a MYC-related transcriptional activator with a typical DNA binding domain of a basic helix-loop-helix leucine zipper motif.
AT4G26110	NAP1;1	Encodes a member of a small gene family of proteins with similarity to nucleosome assembly proteins.May function in nucleotide excision repair.
AT3G14440	NCED3	Encodes 9-cis-epoxycarotenoid dioxygenase, a key enzyme in the biosynthesis of abscisic acid. Regulated in response to drought and salinity.
AT5G63320	NPX1	Encodes NPX1 (Nuclear Protein X1), a nuclear factor regulating abscisic acid responses.
AT2G18470	PERK4	Proline-rich extensin-like receptor kinase 4. Functions at an early stage of ABA signalling inhibiting primary root cell elongation by perturbing Ca2+ homeostasis.
AT2G20180	PIL5	Encodes a novel Myc-related bHLH transcription factor that has transcriptional activation activity in the dark. t is a key negative regulator of phytochrome-mediated seed germination and acts by inhibiting chlorophyll biosynthesis, light-mediated suppression of hypocotyl elongation and far-red light-mediated suppression of seed germination, and promoting negative gravitropism in hypocotyls.
AT3G11410	PP2CA	Encodes protein phosphatase 2C. Negative regulator of ABA signalling.
AT4G15900	PRL1	Encodes a nuclear WD40 protein that is imported into the nucleus. Essential for plant innate immunity. Interacts with MOS4 and AtCDC5.
AT1G79040	PSBR	Encodes for the 10 kDa PsbR subunit of photosystem II (PSII).It is involved in the stable assembly of PSII, particularly that of the oxygen-evolving complex subunit PsbP.
AT2G38310	PYL4	Encodes a member of the PYR (pyrabactin resistance )/PYL(PYR1-like)/RCAR (regulatory components of ABA receptor) family proteins with 14 members.
AT5G05440	PYL5	Encodes a member of the PYR (pyrabactin resistance )/PYL(PYR1-like)/RCAR (regulatory components of ABA receptor) family proteins with 14 members.
AT3G18130	RACK1C_AT	Encodes a protein with similarity to mammalian RACKs. RACKs function to shuttle activated protein kinase C to different subcellular sites and may also function as a scaffold through physical interactions with other proteins.
AT5G53160	RCAR3	Encodes RCAR3, a regulatory component of ABA receptor. Interacts with protein phosphatase 2Cs ABI1 and ABI2. Stimulates ABA signaling.
AT3G26090	RGS1	Encodes AtRGS1, a putative membrane receptor for D-glucose. Also functions as a regulator of G-protein signaling. Has GTPase-accelerating activity. Regulates the activity of AtGPA1.
AT3G48040	ROP10	Encodes a member of the Rop subfamily of Rho GTPases in Arabidopsis that contains a putative farnesylation motif. It is localized to the plasma membrane and involved in the negative regulation of ABA signalling.
AT4G38630	RPN10	Regulatory particle non-ATPase subunit of the 26S proteasome with multiubiquitin-chain-binding capabilities
AT5G48870	SAD1	Encodes a polypeptide similar to multifunctional Sm-like snRNP proteins that are required for mRNA splicing, export, and degradation. Mutation in this gene increases plant sensitivity to drought stress and ABA in seed germination, root growth, and the expression of some stress-responsive genes.
AT1G07420	SMO2-1	SMO2-1 and SMO2-2 function partially through effects on auxin accumulation, auxin response and PIN1 expression to regulate embryogenesis in Arabidopsis.
AT1G08260	TIL1	DNA polymerase epsilon catalytic subunit. Essential for Arabidopsis growth. Null homozygotes are embryo lethal, partial loss of function alleles show embryo patterning defects such as root pole displacement.
AT2G47770	TSPO	Encodes a membrane-bound protein designated AtTSPO related to the bacterial outer membrane tryptophan-rich sensory protein (TspO) and the mammalian mitochondrial 18 kDa Translocator Protein (18 kDa TSPO) and is induced in vegetative tissues by osmotic or salt stress or abscisic acid treatment.
AT2G30250	WRKY25	member of WRKY Transcription Factor; Group I. Located in nucleus. Involved in response to various abiotic stresses - especially salt stress.
AT2G38470	WRKY33	Member of the plant WRKY transcription factor family. Regulates the antagonistic relationship between defense pathways mediating responses to P. syringae and necrotrophic fungal pathogens. Located in nucleus. Involved in response to various abiotic stresses - especially salt stress.
AT5G57740	XBAT32	Encodes a RING-type E3 ligase XBAT32. Mediates the proteasomal degradation of the ethylene biosynthetic enzyme, 1-aminocyclopropane-1-carboxylate synthase 7.
AT1G16540	ABA3	Encodes molybdenum cofactor sulfurase. Involved in Moco biosynthesis. Involved in the conversion of ABA-aldehyde to ABA, the last step of abscisic acid (ABA) biosynthesis
AT1G52340	ABA2	Encodes a cytosolic short-chain dehydrogenase/reductase involved in the conversion of xanthoxin to ABA-aldehyde during ABA biosynthesis. Mutants are insensitive to sucrose and glucose.
AT1G67080	ABA4	Encodes a protein involved in the photoprotection of PSII. An aba4-1 mutant completely lacks neoxanthin,a component of the chromophore of the peripheral antenna system in PSII. ABA4 is required for neoxanthin biosynthesis, an intermediary step in abscisic acid biosynthesis, but no catalytic activity has been detected for the ABA4 protein.
AT2G27150	AAO3	Encodes the aldehyde oxidase delta isoform catalyzing the final step in abscisic acid biosynthesis.
AT4G15560	CLA1	Encodes a protein with 1-deoxyxylulose 5-phosphate synthase activity involved in the MEP pathway. It is essential for chloroplast development in Arabidopsis
AT5G67030	ABA1	Encodes a single copy zeaxanthin epoxidase gene that functions in first step of the biosynthesis of the abiotic stress hormone abscisic acid (ABA). Mutants in this gene are unable to express female sterility in response to beta-aminobutyric acid, as wild type plants do.
AT1G01360	RCAR1	Encodes RCAR1 (regulatory components of ABA receptor). Interacts with and regulates the type 2C protein phosphatases (PP2Cs) ABI1 and ABI2. Functions as abscisic acid sensor.
AT1G64990	GTG1	Encodes a GPCR-type G protein receptor with nine predicted transmembrane domains. The protein binds abscisic acid (ABA) and is predicted to function as an ABA receptor. It has GTP-binding and GTPase activity and binds to ABA more effectively in the presence of GDP. GTG1 binds to GPA1, the alpha subunit of the heterotrimeric G protein.
AT2G40330	PYL6	Encodes a member of the PYR (pyrabactin resistance )/PYL(PYR1-like)/RCAR (regulatory components of ABA receptor) family proteins with 14 members. PYR/PYL/RCAR family proteins function as abscisic acid sensors. Mediate ABA-dependent regulation of protein phosphatase 2Cs ABI1 and ABI2.
AT4G01026	PYL7	Encodes a member of the PYR (pyrabactin resistance )/PYL(PYR1-like)/RCAR (regulatory components of ABA receptor) family proteins with 14 members. PYR/PYL/RCAR family proteins function as abscisic acid sensors. Mediate ABA-dependent regulation of protein phosphatase 2Cs ABI1 and ABI2. PYL/RCAR family proteins function as abscisic acid sensors. Mediate ABA-dependent regulation of ABI1 and ABI2.
AT4G17870	PYR1	Encodes a member of the PYR (pyrabactin resistance )/PYL(PYR1-like)/RCAR (regulatory components of ABA receptor) family proteins with 14 members. PYR/PYL/RCAR family proteins function as abscisic acid sensors. Mediate ABA-dependent regulation of protein phosphatase 2Cs ABI1 and ABI2.
AT4G27630	GTG1	Encodes a GPCR-type G protein receptor with nine predicted transmembrane domains. The protein binds abscisic acid (ABA) and is predicted to function as an ABA receptor. It has GTP-binding and GTPase activity and binds to ABA more effectively in the presence of GDP.
AT4G27920	AT4G27920	Encodes a member of the PYR (pyrabactin resistance )/PYL(PYR1-like)/RCAR (regulatory components of ABA receptor) family proteins with 14 members. PYR/PYL/RCAR family proteins function as abscisic acid sensors. Mediate ABA-dependent regulation of protein phosphatase 2Cs ABI1 and ABI2.
AT5G13630	GUN5	Encodes magnesium chelatase involved in plastid-to-nucleus signal transduction.
AT5G46790	PYL1	Encodes a member of the PYR (pyrabactin resistance )/PYL(PYR1-like)/RCAR (regulatory components of ABA receptor) family proteins with 14 members. PYR/PYL/RCAR family proteins function as abscisic acid sensors. Mediate ABA-dependent regulation of protein phosphatase 2Cs ABI1 and ABI2.
AAF67775	AAF67775
AT1G02205	CER1	CER1 protein is an aldehyde decarbonylase, but the exact molecular function of this protein remains to be determined.
AT1G04710	PKT4	Its transcript levels change after inducing MUTE expression in a mute background. It is involved in oxylipin biosynthetic process
AT1G09950	RAS1	RESPONSE TO ABA AND SALT 1
AT1G15100	RHA2A	Encodes a putative RING-H2 finger protein RHA2a. It is involved in positive regulation of abscisic acid-activated signaling pathway and proteasome-mediated ubiquitin-dependent protein catabolic process,
AT1G16060	ADAP	Encodes ADAP, an AP2-domain protein that interacts with ARIA. ADAP is a positive regulator of the ABA response and is also involved in regulating seedling growth.
AT1G20780	SAUL1	Encodes a protein containing a U-box and an ARM domain. Homozygous mutant seedlings have a seedling lethal phenotype with widespread cell death lesions throughout the cotyledons and roots.
AT1G21970	LEC1	LEC1 is required for the specification of cotyledon identity and the completion of embryo maturation. It was sufficient to induce embryogenic programs in vegetative cells, suggesting that LEC1 is a major embryonic regulator that mediates the switch between embryo and vegetative development.
AT1G25490	RCN1	One of three genes encoding phosphoprotein phosphatase 2A regulatory subunit A; Recessive ethylene-response mutant EER1 displays increased ethylene sensitivity in the hypocotyl and stem
AT1G28300	LEC2	Transcription factor that contains a B3 domain, a DNA-binding motif unique to plants and characteristic of several transcription factors. Plays critical roles both early and late during embryo development. LEC2 RNA accumulates primarily during seed development. LEC2 is required for the maintenance of suspensor morphology, specification of cotyledon identity, progression through the maturation pha…
AT1G34120	IP5PI	Encodes an inositol polyphosphate 5-phosphatase that appears to have Type I activity. It can dephosphorylate IP3(inositol(1,4,5)P3) and IP4 (inositol(1,3,4,5)P4), but it does not act on I(1)P, I(1,4)P2, or phosphatidylinositol(4,5)P2.
AT1G35515	HOS10	High response to osmotic stress 10
AT1G43160	RAP2.6	Encodes a member of the ERF (ethylene response factor) subfamily B-4 of ERF/AP2 transcription factor family (RAP2.6). The protein contains one AP2 domain.
AT1G48630	RACK1B_AT	Encodes a protein with similarity to mammalian RACKs. RACKs function to shuttle activated protein kinase C to different subcellular sites and may also function as a scaffold through physical interactions with other proteins. RACK1B has no phenotype on its own and probably acts redundantly with RACK1A and RACK1C.
AT1G49430	LACS2	Encodes a long chain acyl-CoA synthetase that catalyzes the synthesis of omega-hydroxy fatty acyl-CoA intermediates in the pathway to cutin synthesis. Required for repression of lateral root formation.
AT1G50200	ALATS	Alanyl-tRNA synthetase
AT1G51965	AT1G51965	Encodes ABA Overly-Sensitive5 (ABO5), a pentatricopeptide repeat protein required for cis-splicing of mitochondrial nad2 intron 3. Involved in response to abscisic acid.
AT1G52920	GPCR	Encodes a plasma membrane–localized ABA receptor, which interacts with the Gαβγ complex.
AT1G56070	LOS1	Encodes a translation elongation factor 2-like protein that is involved in cold-induced translation.
AT1G66600	AT1G66600	A member of WRKY Transcription Factor; Group III. Involved in the regulation of plant responses to ABA and drought stress.
AT1G69270	RPK1	RPK1 is a leucine-rich receptor-like kinase located in the plasma membrane which is upregulated by abscisic acid, dehydration, high salt, low temperature. RPK1 plays a role in ABA-controlled cell proliferation and is a regulator of the ABA signal transduction pathway.
AT1G69935	SHW1	Encodes a nuclear localized serine-arginine-aspartate-rich protein that acts as a negative regulator of photomorphogenesis.
AT1G78590	AT1G78590	Encodes a NADH kinase which can synthesize NADPH from NADH; also utilizes NAD+ as substrate although NADH is the preferred substrate.
AT2G22090	UBA1A	encodes a nuclear protein that binds to RNA with a specificity for oligouridylates in vitro. As with UBP1, transient overexpression of UBA1a in protoplasts increases the steady-state levels of reporter mRNAs in a promoter-dependent manner. Along with UBP1 and UBA2a, it may act as a component of a complex recognizing U-rich sequences in plant 3'-UTRs and contributing to the stabilization of mRNAs …
AT2G23430	ICK1	Encodes a cyclin-dependent kinase inhibitor protein that functions as a negative regulator of cell division and promoter of endoreduplication. A member of seven KRP genes found in Arabidopsis thaliana. Differential expression patterns for distinct KRPs were revealed by in situ hybridization.
AT2G26290	ARSK1	Root-specific kinase 1 which is involved in cell surface receptor signaling pathway, defense response and protein phosphorylation
AT2G26980	CIPK3	Encodes a serine-threonine protein kinase whose expression increases in response to abscisic acid, cold, drought, high salt, and wounding conditions. The gene is expressed in developing seeds and seedlings.
AT2G31470	DOR	Encodes a F-Box protein DOR (Drought tolerance Repressor) functionally as an inhibitory factor for abscisic acid-induced stomatal closure under drought stress.
AT2G31660	SAD2	SAD2 (super sensitive to ABA and drought 2) encodes an importin beta-domain family protein likely to be involved in nuclear transport in ABA signaling. Loss of function mutations in SAD2 exhibit increased tolerance for UV stress, increased production of UV protective secondary metabolites and suppression of nuclear localization of MYB4 (a repressor of UV stress response genes).
AT2G33790	AGP30	Pollen Ole e 1 allergen protein containing 14.6% proline residues, similar to arabinogalactan protein (Daucus carota) GI:11322245, SP:Q03211 Pistil-specific extensin-like protein precursor (PELP) {Nicotiana tabacum}; contains Pfam profile PF01190: Pollen proteins Ole e I family. it is involved in regulation of root development and seed dormancy process
AT2G34900	IMB1	Encodes a member of the BET subgroup of bromodomain proteins, a novel class of putative transcription factors. Its expression is induced during seed imbibition and downregulated during germination. Imb1 seeds are deficient in the phytochrome A (phyA)-mediated very-low-fluence response of germination.
AT2G39550	PGGT-I	Encodes the beta subunit of geranylgeranyl transferase (GGT-IB), involved in both ABA-mediated and auxin signaling pathways.
AT2G40180	ATHPP2C5	Encodes PP2C5, a member of the PP2C family phosphatases. PP2C5 acts as a MAPK phosphatase that positively regulates seed germination, stomatal closure and ABA-inducible gene expression.
AT2G40220	ABI4	Encodes a member of the DREB subfamily A-3 of ERF/AP2 transcription factor family (ABI4). The protein contains one AP2 domain. Involved in abscisic acid (ABA) signal transduction, ABA-mediated glucose response, and hexokinase-dependent sugar responses. Acts downstream of GUN1 in retrograde signaling. Expressed most abundantly in developing siliques and to a lesser degree in seedlings.
AT2G40340	AT2G40350|DREB2C	Encodes a member of the DREB subfamily A-2 of ERF/AP2 transcription factor family. The protein contains one AP2 domain. There are eight members in this subfamily including DREB2A and DREB2B that are involved in response to drought.
AT2G42680	MBF1A	One of three genes in A. thaliana encoding multiprotein bridging factor 1, a highly conserved transcriptional coactivator. May serve as a bridging factor between a bZIP factor and TBP. Its expression is developmentally regulated.
AT2G46370	JAR1	Encodes a jasmonate-amido synthetase that is a member of the GH3 family of proteins. JAR1 catalyzes the formation of a biologically active jasmonyl-isoleucine (JA-Ile) conjugate. JA-Ile promotes the interaction between JAZ1 and COI1 in the jasmonate signaling pathway. JAR1 has additional enzymatic activities in vitro and is involved in pathogen defense, sensitivity to ozone, and wound responses.
AT2G46830	CCA1	Encodes a transcriptional repressor that performs overlapping functions with LHY in a regulatory feedback loop that is closely associated with the circadian oscillator of Arabidopsis. Binds to the evening element in the promoter of TOC1 and represses TOC1 transcription. CCA1 and LHY colocalize in the nucleus and form heterodimers in vivo.
AT3G08550	KOB1	Mutant is Dwarfed and shows defects in cell elongation. It is involved in abscisic acid-activated signaling pathway, maintenance of root meristem identity and plant-type cell wall modification.
AT3G11240	ATE2	Encodes an arginyl-tRNA:protein arginyltransferase (ATE2), a component of the N-end rule pathway that targets protein degradation through the identity of the amino-terminal residue of specific protein substrates.
AT3G12490	ATCYSB	Encodes a protein with cysteine proteinase inhibitor activity. Overexpression increases tolerance to abiotic stressors
AT3G15730	PLDALPHA1	Encodes phospholipase D alpha 1 (PLD alpha 1). Positive regulator of abscisic acid (ABA) mediated stomatal movements. PLD alpha 1 plays an important role in seed deterioration and aging in Arabidopsis.
AT3G20770	EIN3	Encodes EIN3 (ethylene-insensitive3). EIN3 interacts with MYC2, MYC3 and MYC4 to inhibit jasmonate-induced expression of wound-responsive genes and herbivory-inducible genes, and plant defense against generalist herbivores.
AT3G24520	HSFC1	Member of Heat Stress Transcription Factor (Hsf) family. It is involved in regulation of transcription.
AT3G26790	FUS3	Full length FUS3 protein binds to the highly conserved RY motif [DNA motif CATGCA(TG)], present in many seed-specific promoters, and the B3 domains of this transcription factor is necessary for the specific interaction with the RY element. FUS3 specifies cotyledon identity. Regulator of gene expression during late embryogenesis. Involved in the control foliar organ identity in Arabidopsis by regu…
AT3G48360	BT2	encodes a protein (BT2) that is an essential component of the TAC1-mediated telomerase activation pathway. Acts redundantly with BT3 and BT1 during female gametophyte development and with BT3 during male gametophyte development. BT2 also mediates multiple responses to nutrients, stresses, and hormones.
AT3G53480	PDR9	Negative regulator of auxin polar transport inhibitors. ABCG37 regulates auxin distribution and homeostasis in roots by excluding IBA from the root apex, but does not act directly in basipetal transport. ABCG37 and ABCG36 act redundantly at outermost root plasma membranes and, transport IBA out of the cells. Also involved in root transmembrane secretion of fluorescent phenolics involved in Fe upt…
AT3G54320	WRI1	WRINKLED1 encodes transcription factor of the AP2/ERWEBP class. Protein has two plant-specific (AP2/EREB) DNA-binding domains and is involved in the control of storage compound biosynthesis in Arabidopsis. Mutants have wrinkled seed phenotype, due to a defect in the incorporation of sucrose and glucose into triacylglycerols.
AT3G55530	SDIR1	Encodes an intracellular membrane localized protein with E3 ligase activity, found in the ER with the C-terminus facing the cytoplasm. It is involved in regulation of ABA signaling.
AT3G58680	MBF1B	One of three genes in A. thaliana encoding multiprotein bridging factor 1, a highly conserved transcriptional coactivator. May serve as a bridging factor between a bZIP factor and TBP. Its expression is developmentally regulated.
AT4G16280	FCA	Involved in the promotion of the transition of the vegetative meristem to reproductive development. Four forms of the protein (α，β，δ and γ) are produced by alternative splicing. Involved in RNA-mediated chromatin silencing.
AT4G18010	AT5PTASE2	Encodes an inositol polyphosphate 5-phosphatase that appears to have Type I activity. It can dephosphorylate IP3(inositol(1,4,5)P3) and IP4 (inositol(1,3,4,5)P4), but it does not appear to be active against phosphatidylinositol 4,5 bisphosphate. Overexpression of this gene renders plants insensitive to ABA in germination and growth assays.
AT4G19850	PP2-A2	Encodes a protein similar to phloem protein 2 in cucumber. a member of a large gene family.
AT4G25470	CBF2	Encodes a member of the DREB subfamily A-1 of ERF/AP2 transcription factor family (CBF2). The protein contains one AP2 domain. This gene is involved in response to low temperature, abscisic acid, and circadian rhythm. Mutations in CBF2 increases the expression level of CBF1 and CBF3, suggesting that this gene may be involved in a negative regulatory or feedback circuit of the CBF pathway.
AT4G33950	OST1	Encodes calcium-independent ABA-activated protein kinase, a member of SNF1-related protein kinases (SnRK2) whose activity is activated by ionic (salt) and non-ionic (mannitol) osmotic stress. Mutations disrupted ABA induction of stomatal closure as well as ABA inhibition of light-induced stomatal opening.
AT4G39850	PXA1	Encodes a peroxisomal protein of the ATP binding cassette (ABC) transporter class (PMP subfamily) with significant identity to the human X-linked adrenoleukodystrophy protein (ALDP). The gene product promotes germination and represses embryo dormancy.
AT5G02310	PRT6	Encodes PROTEOLYSIS6 (PRT6), a component of the N-end rule pathway that targets protein degradation through the identity of the amino-terminal residue of specific protein substrates. PRT6 and ATE were shown to regulate seed after-ripening, seedling sugar sensitivity, seedling lipid breakdown, and abscisic acid (ABA) sensitivity of germination.
AT5G05700	ATE1	Encodes an arginyl-tRNA:protein transferase (ATE1), a component of the N-end rule pathway that targets protein degradation through the identity of the amino-terminal residue of specific protein substrates. PRT6 and ATE were shown to regulate seed after-ripening, seedling sugar sensitivity, seedling lipid breakdown, and abscisic acid (ABA) sensitivity of germination. Mutants of ATE1 also display d…
AT5G10560	AT5G10560	Glycosyl hydrolase family protein. It is involved in carbohydrate metabolic process.
AT5G13530	KEG	Encodes KEEP ON GOING (KEG), a RING E3 ligase involved in abscisic acid signaling. KEG is essential for Arabidopsis growth and development. ABA promotes KEG degradation via the ubiquitin dependent 26S proteasome pathway.
AT5G15970	KIN1	Encodes a gene that can be induced by cold and abscisic acid and may be involved in cold acclimation and salt tolerance.
AT5G19330	ARIA	Encodes an armadillo repeat protein involved in the abscisic acid response. The protein interacts with a transcription factor, ABF2, which controls ABA-dependent gene expression via the G-box-type ABA-responsive elements.
AT5G20910	AT5G20910	Encodes an E3 ligase that can interact with and polyubiquitinate ABI3 in vitro. AIP2 likely negatively regulates ABA signaling by targeting ABI3 for post-translational destruction.
AT5G23720	PHS1	Encodes a protein tyrosine phosphatase Propyzamide-Hypersensitive 1 (PHS1). One of the mutant alleles, phs1-1, is hypersensitive to the microtubule-destabilizing drug propyzamide, suggesting that PHS1 may be involved in phosphorylation cascades that control the dynamics of cortical microtubules in plant cells. A second allele, phs1-3, is hypersensitive to abscisic acid, indicating a possible invo…
AT5G40280	ERA1	Encodes a beta subunit of farnesyl-trans-transferase, which is involved in meristem organization and ABA-mediated signal transduction pathway. Mutant phenotypes have been observed in meristem organization, and response to abscisic acid and drought.
AT5G52310	LTI78	Cold regulated gene, the 5' region of cor78 has cis-acting regulatory elements that can impart cold-regulated gene expression.
AT5G56270	WRKY2	Encodes WRKY transcription factor 2, a zinc-finger protein. In wrky2 mutants, egg cells polarize normally but zygotes fail to reestablish polar organelle positioning from a transient symmetric state, resulting in equal cell division and distorted embryo development.
AT5G57390	AIL5	Encodes a member of the AP2 family of transcriptional regulators. Mutants are resistant to ABA analogs and are resistant to high nitrogen concentrations. Essential for the developmental transition between the embryonic and vegetative phases in plants. It is also required to maintain high levels of PIN1 expression at the periphery of the meristem and modulate local auxin production in the central …
AT5G57800	CER3	Encodes a transmembrane protein with similarity to the sterol desaturase family at the N-terminus and to the short-chain dehydrogenase/reductase family at the C-terminus. Mutant analyses indicate this protein is involved in cuticle membrane and wax biosynthesis.
AT5G60410	SIZ1	Encodes a plant small ubiquitin-like modifier (SUMO) E3 ligase that is a focal controller of Pi starvation-dependent responses. Also required for SA and PAD4-mediated R gene signalling, which in turn confers innate immunity in Arabidopsis. Also involved in the regulation of plant growth, drought responses and freezing tolerance. This latter effect is most likely due to SIZ1 dependent ABI5 sumoyla…
AT5G62470	MYB96	Encodes a R2R3 type Myb transcription factor whose expression is strongly induced by abscisic acid. Mediates abscisic acid signaling during drought stress response.
AT5G63980	SAL1	Encodes a bifunctional protein that has 3'(2'),5'-bisphosphate nucleotidase and inositol polyphosphate 1-phosphatase activities and rescues sulfur assimilation mutants in yeast. It is involved in the response to cold, drought (negative regulator of drought tolerance), and ABA. Its kinase activity is sensitive to the redox state of its environment, decreasing under oxidative conditions. Kinase act…
AT5G66400	RAB18	Belongs to the dehydrin protein family, which contains highly conserved stretches of 7-17 residues that are repetitively scattered in their sequences, the K-, S-, Y- and lysine rich segments. ABA- and drought-induced glycine-rice dehydrin protein. RAB18 is also expressed in response to the formation of the phospholipid diacylglycerol pyrophosphate.
AT5G67300	MYBR1	Member of the R2R3 factor MYB gene family involved in mediating plant responses to a variety of abiotic stimiuli.
AT5G67500	VDAC2	Encodes a voltage-dependent anion channel. VDACs are reported to be porin-type, beta-barrel diffusion pores. They are prominently localized in the outer mitochondrial membrane and are involved in metabolite exchange between the organelle and the cytosol.
CPR22	CPR22	Member of Cyclic nucleotide gated channel family.Positive regulator of resistance against avirulent fungal pathogen.Suppresses the phenotype conferred by cpr22 in a dosage-dependent manner.
GCA1	GCA1
GCA2	GCA2	Isolated in a screen for abscisic acid insensitive plants. Affects stomatal responses to ABA.
GCA3-GCA8	GCA3-GCA8
GRS	GRS	GRS1 is a mitochondrial PLS-type PRR protein required for RNA editing and plant development.
HOS5	HOS5	Encodes a KH domain-containing putative RNA-binding protein RCF3. Functions as a upstream regulator for heat stress-responsive gene expression and thermotolerance and mediation of jasmonate signalling.Also shown to interact with HYL1 and is a component of the nuclear dicing body and to function in primary miRNA processing.
SAX1	SAX1	A dwarf mutant, which is affected in brassinosteroid biosynthesis. The SAX1 protein is involved in brassinosteroid-dependent growth of seedlings in both light and dark conditions.
UVS66	UVS66
AT1G71960	ABCG25	Encodes a plasma membrane localized ABC transporter involved in abscisic acid transport and responses.
HLQ	HLQ	Encodes putative eukaryotic homolog of archaebacterial topoisomerase VI subunit B, TOP6B. Is essential for endoreduplication and is involved in cell expansion and cell proliferation. The hlq (harlequin) dwarf mutant has fewer root hair and leaf trichome. It has abnormal epidermal cell and accumulates callose.

## Sheet: JA pathway proteins
Gene ID	Gene
AT4G02570	ATCUL1	Encodes a cullin that is a component of SCF ubiquitin ligase complexes involved in mediating responses to auxin and jasmonic acid.
AT4G01370	ATMPK4	Encodes a nuclear and cytoplasmically localized MAP kinase involved in mediating responses to pathogens.
AT2G43790	ATMPK6	Encodes a MAP kinase induced by pathogens, ethylene biosynthesis, oxidative stress and osmotic stress.Also involved in ovule development.
AT3G27920	ATMYB0	Encodes GL1, a Myb-like protein that is required for induction of trichome development. Interacts with JAZ and DELLA proteins to regulate trichome initiation.
AT4G03560	ATTPC1	a depolarization-activated Ca(2+) channel, which mediates a voltage-activated Ca(2+ )influx.
AT1G05180	AXR1	a subunit of the RUB1 activating enzyme that regulates the protein degradation activity of Skp1-Cullin-Fbox complexes,
AT5G05170	CEV1	Encodes a cellulose synthase isomer. CESA3 mutants have cellulose defect in the primary cell wall.
AT2G39940	COI1	Encodes a protein containing Leu-rich repeats and a degenerate F-box motif.
AT1G63650	EGL3	Encodes a bHLH Transcription Factor 1. The protein is functionally redundant with GL3 and TT8 and interacts with TTG1
AT2G29980	FAD3	Endoplasmic reticulum enzyme responsible for the synthesis of 18:3 fatty acids from phospholipids.
AT1G19180	JAZ1	JAZ1 is a nuclear-localized protein involved in jasmonate signaling.
AT3G17860	JAZ3	JAZs are direct targets of the SCFCOI1 E3 ubiquitin-ligase and JA treatment induces their proteasome-mediated degradation.
AT5G40330	MYB23	Encodes a MYB gene, which is expressed in leaves, stems, flowers, seeds and roots and quite strongly in trichomes.
AT1G32640	MYC2	Encodes a MYC-related transcriptional activator with a typical DNA binding domain of a basic helix-loop-helix leucine zipper motif.
AT4G28910	NINJA	Putative interactor of JAZ
AT5G11270	OCP3	Encodes a homeodomain transcription factor involved in mediating resistance to infection by necrotrophic pathogens dependent on perception of jasmonic acid through COI1.
PAD1	PAD1	20S proteosomal alpha subunits.
AT2G43710	SSI2	Encodes a stearoyl-ACP desaturase, involved in fatty acid desaturation.
AT5G24520	TTG1	Required for the accumulation of purple anthocyanins in leaves and stems. Involved in trichome and root hair development.
AT5G40350	MYB24	Member of the R2R3 factor gene family. Induced by jasmonate. Involved in jasmonate response during stamen development.
AT1G19640	JMT	Encodes a S-adenosyl-L-methionine:jasmonic acid carboxyl methyltransferase that catalyzes the formation of methyljasmonate from jasmonic acid.
AT2G06050	OPR3	Encodes a 12-oxophytodienoate reductase that is required for jasmonate biosynthesis.
AT2G44810	DAD1	The DAD1 protein is a chloroplastic phospholipase A1 that catalyzes the initial step of jasmonic acid biosynthesis.
AT3G11170	FAD7	Chloroplastic enzyme responsible for the synthesis of 16:3 and 18:3 fatty acids from galactolipids, sulpholipids and phosphatidylglycerol.
AT3G15730	PLDALPHA1	Encodes phospholipase D alpha 1 (PLD alpha 1). Positive regulator of abscisic acid (ABA) mediated stomatal movements.
AT3G45140	LOX2	Chloroplast lipoxygenase required for wound-induced jasmonic acid accumulation in Arabidopsis.
AT4G29010	AIM1	Functions in beta-oxidation of fatty acids, similar to CuMFP with L-3-hydroxyacyl-CoA hydrolyase , L-3-hydroxyacyl-dehydrogenase.
AT5G05580	FAD7-FAD8	Encodes a temperature sensitive plastidic fatty acid desaturase.
AT5G05730	ASA1	ASA1 encodes the alpha subunit of anthranilate synthase, which catalyzes the rate-limiting step of tryptophan synthesis.
AT5G42650	AOS	Encodes a member of the cytochrome p450 CYP74 gene family that functions as an allene oxide synthase.
AT1G53940	GLIP2	Encodes a lipase, has in vitro lipase activity with p-nitrophenyl acetate and p-nitrophenyl butyrate, gene expression induced by hormones
AT2G44050	COS1	6,7-dimethyl-8-ribityllumazine synthase / DMRL synthase / lumazine synthase / riboflavin synthase. Acts in the jasmonic acid signaling pathway.
AT2G46370	JAR1	Encodes a jasmonate-amido synthetase that is a member of the GH3 family of proteins.
AT3G01530	AtMYB57	Member of the R2R3 factor gene family.MYB57 interacts with JAZ proteins, and functions redundantly with MYB21 and MYB24 to regulate stamen development.
AT3G06490	MYB108	Putative transcription factor MYB108 (MYB108) Mrna. It is involved in cell differentiation, defense response,
AT3G15356	AT3G15356	Legume lectin family protein. It is involved in cellular response to chitin, cellular response to ethylene stimulus, cellular response to jasmonic acid stimulus, defense response to fungus.
AT3G23240	ERF1	Encodes a member of the ERF (ethylene response factor) subfamily B-3 of ERF/AP2 transcription factor family (ERF1). The protein contains one AP2 domain. Constitutive expression of ERF1 phenocopies ethylene over production. Involved in ethylene signaling cascade,downstream of EIN2 and EIN3.
AT3G27670	RST1	A novel protein reveals a novel genetic connection between lipid synthesis and embryo development.
AT3G27810	ATMYB21	Encodes a member of the R2R3-MYB transcription factor gene family. Induced by jasmonate. Involved in jasmonate response during stamen development. MYB21 interacts with JAZ proteins, and functions redundantly with MYB24 and MYB57 to regulate stamen development.
AT3G56400	WRKY70	Member of WRKY Transcription Factor; Group III. Function as activator of SA-dependent defense genes and a repressor of JA-regulated genes.
AT4G25470	CBF2	Encodes a member of the DREB subfamily A-1 of ERF/AP2 transcription factor family (CBF2). The protein contains one AP2 domain.
AT4G38130	HD1	Encodes a histone deacetylase that enhances AtERF7-mediated transcriptional repression.
AT5G40350	MYB24	Member of the R2R3 factor gene family. Induced by jasmonate. Involved in jasmonate response during stamen development.
AT5G40440	ATMKK3	Encodes a mitogen-activated protein kinase kinase.
AT5G57390	AIL5	Encodes a member of the AP2 family of transcriptional regulators.
AT5G67300	MYBR1	Member of the R2R3 factor MYB gene family involved in mediating plant responses to a variety of abiotic stimiuli.
CEX1	CEX1	An unmapped genetic locus that is involved in jasmonic acid response pathway.
EDS8(ENHANCED DISEASE SUSCEPTIBILITY 8)	EDS8(ENHANCED DISEASE SUSCEPTIBILITY 8)	Mutant has compact rosette and serrated leaves. Involved in disease resistance.
HRL1(HYPERSENSITIVE RESPONSE-LIKE LESION 1)	HRL1(HYPERSENSITIVE RESPONSE-LIKE LESION 1)	Mutants develop HR-like necrotic lesions and displays enhanced resistance to virulent bacterial and oomycete pathogens.
JOE1(JASMONATE OVEREXPRESSING1)	JOE1(JASMONATE OVEREXPRESSING1)	Genetic locus involved in jasmonate signalling. Mapped to a 12 cM interval on chromosome 4 to which no mutants with JA-related phenotypes have been mapped.
JOE2(JASMONATE OVEREXPRESSING2)	JOE2(JASMONATE OVEREXPRESSING2)	Genetic locus involved in jasmonate signalling. Maps to the same region on chromosome 5 as cev1. May or may not be allelic to cev1.
JUE1(JASMONATE UNDEREXPRESSING 1)	JUE1(JASMONATE UNDEREXPRESSING 1)	Genetic locus involved in jasmonate signalling.
JUE2(JASMONATE UNDEREXPRESSING 2)	JUE2(JASMONATE UNDEREXPRESSING 2)	Genetic locus involved in jasmonate signalling.
JUE3(JASMONATE UNDEREXPRESSING 3)	JUE3(JASMONATE UNDEREXPRESSING 3)	putative beta-galactosidase (BGAL14 gene)
OJI1	OJI1
AT2G31660	SAD2	SAD2 (super sensitive to ABA and drought 2) encodes an importin beta-domain family protein likely to be involved in nuclear transport in ABA signaling.
