# Supplementary material for: Cytosolic and Nucleosolic Calcium-Regulated Molecular Networks in Response to Long-Term Treatment with Abscisic Acid and Methyl Jasmonate in Arabidopsis thaliana
Source: Genes (Basel). 2022 Mar 16;13(3):524. doi: 10.3390/genes13030524 (PMC8950999; doi:10.3390/genes13030524)
Supplement: Supplementary file 1 [file genes-13-00524-s001.zip › Table S7 The genes in co-expression network.xlsx]

## Sheet: Sheet1
Table S7. The genes in the co-expression network, which include [Ca2+]-regulated hormone-responsive genes, the genes encoding calcium signal proteins and hormonal pathway. proteins. Degree value of gene representes the number of correlated partners.
AGI	Name	Degree	Description
AT3G23250	MYB15	5	[Ca2+]nuc-regulated MeJA responsive genes
AT2G22560	NET2D	3	[Ca2+]nuc-regulated MeJA responsive genes
AT4G33150	SDH	3	[Ca2+]nuc-regulated MeJA responsive genes
AT5G06690	WCRKC1	3	[Ca2+]nuc-regulated MeJA responsive genes
AT5G09530	PRP10	3	[Ca2+]nuc-regulated MeJA responsive genes
AT1G08550	NPQ1	2	[Ca2+]nuc-regulated MeJA responsive genes
AT2G33830	DRM2	2	[Ca2+]nuc-regulated MeJA responsive genes
AT4G33740	AT4G33740	2	[Ca2+]nuc-regulated MeJA responsive genes
AT4G36540	BEE2	2	[Ca2+]nuc-regulated MeJA responsive genes
AT1G52410	TSA1	1	[Ca2+]nuc-regulated MeJA responsive genes
AT3G18390	EMB1865	1	[Ca2+]nuc-regulated MeJA responsive genes
AT3G57710	RKS1	1	[Ca2+]nuc-regulated MeJA responsive genes
AT5G53880	AT5G53880	1	[Ca2+]nuc-regulated MeJA responsive genes
AT3G05890	RCI2B	8	[Ca2+]nuc-regulated ABA responsive genes
AT1G53590	NTMC2T6.1	3	[Ca2+]nuc-regulated ABA responsive genes
AT4G26190	AT4G26190	2	[Ca2+]nuc-regulated ABA responsive genes
AT3G26440	AT3G26440	30	[Ca2+]cyt-regulated MeJA responsive genes
AT1G49310	AT1G49310	11	[Ca2+]cyt-regulated MeJA responsive genes
AT2G44380	AT2G44380	5	[Ca2+]cyt-regulated MeJA responsive genes
AT5G56540	AGP14	5	[Ca2+]cyt-regulated MeJA responsive genes
AT4G35060	AT4G35060	4	[Ca2+]cyt-regulated MeJA responsive genes
AT5G06570	AT5G06570	4	[Ca2+]cyt-regulated MeJA responsive genes
AT1G61820	BGLU46	3	[Ca2+]cyt-regulated MeJA responsive genes
AT3G25820	TPS-CIN	3	[Ca2+]cyt-regulated MeJA responsive genes
AT1G49200	AT1G49200	2	[Ca2+]cyt-regulated MeJA responsive genes
AT4G23700	ATCHX17	2	[Ca2+]cyt-regulated MeJA responsive genes
AT2G25510	AT2G25510	1	[Ca2+]cyt-regulated MeJA responsive genes
AT3G45160	AT3G45160	1	[Ca2+]cyt-regulated MeJA responsive genes
ATCG00300	YCF9	32	[Ca2+]cyt-regulated ABA responsive genes
AT3G25690	CHUP1	17	[Ca2+]cyt-regulated ABA responsive genes
AT3G04760	AT3G04760	14	[Ca2+]cyt-regulated ABA responsive genes
ATCG01100	ndhA	8	[Ca2+]cyt-regulated ABA responsive genes
AT1G77130	PGSIP2	7	[Ca2+]cyt-regulated ABA responsive genes
AT5G13190	AT5G13190	7	[Ca2+]cyt-regulated ABA responsive genes
AT5G20230	ATBCB	7	[Ca2+]cyt-regulated ABA responsive genes
AT1G64330	AT1G64330	6	[Ca2+]cyt-regulated ABA responsive genes
ATCG00810	rpl22	6	[Ca2+]cyt-regulated ABA responsive genes
ATCG00080	psbI	5	[Ca2+]cyt-regulated ABA responsive genes
AT3G01290	HIR2	4	[Ca2+]cyt-regulated ABA responsive genes
AT3G19170	PREP1	4	[Ca2+]cyt-regulated ABA responsive genes
AT4G12310	CYP706A5	4	[Ca2+]cyt-regulated ABA responsive genes
ATCG00740	rpoA	4	[Ca2+]cyt-regulated ABA responsive genes
AT1G03080	AT1G03080	3	[Ca2+]cyt-regulated ABA responsive genes
AT1G17360	AT1G17360	3	[Ca2+]cyt-regulated ABA responsive genes
AT2G32560	AT2G32560	3	[Ca2+]cyt-regulated ABA responsive genes
AT3G22240	AT3G22240	3	[Ca2+]cyt-regulated ABA responsive genes
AT4G19420	AT4G19420	3	[Ca2+]cyt-regulated ABA responsive genes
AT4G23810	WRKY53	3	[Ca2+]cyt-regulated ABA responsive genes
AT4G25780	CAPE2	3	[Ca2+]cyt-regulated ABA responsive genes
AT4G34890	XDH1	3	[Ca2+]cyt-regulated ABA responsive genes
AT5G24590	TIP	3	[Ca2+]cyt-regulated ABA responsive genes
AT2G43060	IBH1	2	[Ca2+]cyt-regulated ABA responsive genes
AT3G16530	AT3G16530	2	[Ca2+]cyt-regulated ABA responsive genes
AT3G18170	AT3G18170	2	[Ca2+]cyt-regulated ABA responsive genes
AT5G06320	NHL3	2	[Ca2+]cyt-regulated ABA responsive genes
AT5G64260	EXL2	2	[Ca2+]cyt-regulated ABA responsive genes
AT5G67240	SDN3	2	[Ca2+]cyt-regulated ABA responsive genes
AT1G44910	PRP40A	1	[Ca2+]cyt-regulated ABA responsive genes
AT5G14730	AT5G14730	1	[Ca2+]cyt-regulated ABA responsive genes
AT5G58760	DDB2	1	[Ca2+]cyt-regulated ABA responsive genes
AT5G64120	PRX71	1	[Ca2+]cyt-regulated ABA responsive genes
AT3G19370	AT3G19370	4	[Ca2+]cyt and [Ca2+]nuc-regulated MeJA responsive genes
AT1G54410	HIRD11	3	[Ca2+]cyt and [Ca2+]nuc-regulated MeJA responsive genes
AT2G21560	AT2G21560	2	[Ca2+]cyt and [Ca2+]nuc-regulated MeJA responsive genes
AT1G10370	ERD9	1	[Ca2+]cyt and [Ca2+]nuc-regulated MeJA responsive genes
AT1G21100	IGMT1	3	[Ca2+]nuc-regulated ABA responsive, [Ca2+]cyt and [Ca2+]nuc-regulated MeJA responsive genes
AT3G16000	MFP1	2	[Ca2+]cyt-regulated ABA responsive and [Ca2+]nuc-regulated MeJA responsive genes
AT1G28400	AT1G28400	3	[Ca2+]cyt-regulated ABA responsive, [Ca2+]cyt and [Ca2+]nuc-regulated MeJA responsive genes
AT5G17330	GAD	39	Decoding protein of calcium signaling
AT5G37780	CAM1	39	Decoding protein of calcium signaling
AT5G20720	CPN20	26	Decoding protein of calcium signaling
AT4G24400	CIPK8	23	Decoding protein of calcium signaling
AT3G20410	CPK9	12	Decoding protein of calcium signaling
AT5G65210	TGA1	11	Decoding protein of calcium signaling
AT2G24610	CNGC14	10	Decoding protein of calcium signaling
AT5G24270	SOS3	10	Decoding protein of calcium signaling
AT4G37010	CML19	9	Decoding protein of calcium signaling
AT1G74740	CPK30	8	Decoding protein of calcium signaling
AT2G43040	NPG1	6	Decoding protein of calcium signaling
AT5G64040	PSAN	6	Decoding protein of calcium signaling
AT1G10130	ECA3	5	Decoding protein of calcium signaling
AT3G43810	CAM7	5	Decoding protein of calcium signaling
AT4G38230	CPK26	5	Decoding protein of calcium signaling
AT1G66410	CAM4	4	Decoding protein of calcium signaling
AT4G33000	CBL10	4	Decoding protein of calcium signaling
AT5G47100	CBL9	4	Decoding protein of calcium signaling
AT1G02780	EMB2386	3	Decoding protein of calcium signaling
AT1G30270	CIPK23	3	Decoding protein of calcium signaling
AT2G36910	ABCB1	3	Decoding protein of calcium signaling
AT2G38800	AT2G38800	3	Decoding protein of calcium signaling
AT4G02230	AT4G02230	3	Decoding protein of calcium signaling
AT4G14580	CIPK4	3	Decoding protein of calcium signaling
AT4G23650	CDPK6	3	Decoding protein of calcium signaling
AT4G30560	CNGC9	3	Decoding protein of calcium signaling
AT1G12310	AT1G12310	2	Decoding protein of calcium signaling
AT1G27460	NPGR1	2	Decoding protein of calcium signaling
AT1G27770	ACA1	2	Decoding protein of calcium signaling
AT1G49580	CRK8	2	Decoding protein of calcium signaling
AT1G65960	GAD2	2	Decoding protein of calcium signaling
AT1G76650	CML38	2	Decoding protein of calcium signaling
AT2G17290	CPK6	2	Decoding protein of calcium signaling
AT2G23980	CNGC6	2	Decoding protein of calcium signaling
AT2G46450	CNGC12	2	Decoding protein of calcium signaling
AT3G10190	CML36	2	Decoding protein of calcium signaling
AT3G10300	CML49	2	Decoding protein of calcium signaling
AT3G16780	AT3G16780	2	Decoding protein of calcium signaling
AT3G25230	ROF1	2	Decoding protein of calcium signaling
AT3G28140	AT3G28140	2	Decoding protein of calcium signaling
AT4G00500	AT4G00500	2	Decoding protein of calcium signaling
AT4G17615	CBL1	2	Decoding protein of calcium signaling
AT5G19450	CDPK19	2	Decoding protein of calcium signaling
AT5G26920	CBP60G	2	Decoding protein of calcium signaling
AT5G44460	CML43	2	Decoding protein of calcium signaling
AT1G56410	ERD2	1	Decoding protein of calcium signaling
AT2G27030	CAM5	1	Decoding protein of calcium signaling
AT3G03000	AT3G03000	1	Decoding protein of calcium signaling
AT3G19100	CRK2	1	Decoding protein of calcium signaling
AT3G50360	CML20	1	Decoding protein of calcium signaling
AT3G56760	AT3G56760	1	Decoding protein of calcium signaling
AT4G26570	CBL3	1	Decoding protein of calcium signaling
AT4G34750	SAUR49	1	Decoding protein of calcium signaling
AT5G04870	CPK1	1	Decoding protein of calcium signaling
AT5G35410	SOS2	1	Decoding protein of calcium signaling
AT5G56360	PSL4	1	Decoding protein of calcium signaling
AT5G57630	CIPK21	1	Decoding protein of calcium signaling
AT2G29980	FAD3	2	Gene participated in MeJA pathway
AT2G43710	SSI2	1	Gene participated in MeJA pathway
AT3G11170	FAD7	1	Gene participated in MeJA pathway
AT4G38130	HD1	1	Gene participated in MeJA pathway
AT4G15560	CLA1	32	Gene participated in ABA pathway
AT5G13630	GUN5	27	Gene participated in ABA pathway
AT1G69935	SHW1	12	Gene participated in ABA pathway
AT5G57740	XBAT32	7	Gene participated in ABA pathway
AT1G79040	PSBR	6	Gene participated in ABA pathway
AT3G54320	WRI1	6	Gene participated in ABA pathway
AT1G04710	PKT4	5	Gene participated in ABA pathway
AT1G15100	RHA2A	5	Gene participated in ABA pathway
AT1G16060	ADAP	4	Gene participated in ABA pathway
AT1G51500	CER5	4	Gene participated in ABA pathway
AT3G26090	RGS1	4	Gene participated in ABA pathway
AT4G26110	NAP1;1	4	Gene participated in ABA pathway
AT5G02310	PRT6	4	Gene participated in ABA pathway
AT2G20180	PIL5	3	Gene participated in ABA pathway
AT2G23430	ICK1	3	Gene participated in ABA pathway
AT2G34900	IMB1	3	Gene participated in ABA pathway
AT3G23050	IAA7	3	Gene participated in ABA pathway
AT5G13680	ABO1	3	Gene participated in ABA pathway
AT5G48870	SAD1	3	Gene participated in ABA pathway
AT1G04120	ATMRP5	2	Gene participated in ABA pathway
AT3G63210	MARD1	2	Gene participated in ABA pathway
AT1G01360	RCAR1	1	Gene participated in ABA pathway
AT1G18080	ATARCA	1	Gene participated in ABA pathway
AT1G64990	GTG1	1	Gene participated in ABA pathway
AT2G42680	MBF1A	1	Gene participated in ABA pathway
AT5G20910	AT5G20910	1	Gene participated in ABA pathway
