# Supplementary material for: Cytosolic and Nucleosolic Calcium-Regulated Molecular Networks in Response to Long-Term Treatment with Abscisic Acid and Methyl Jasmonate in Arabidopsis thaliana
Source: Genes (Basel). 2022 Mar 16;13(3):524. doi: 10.3390/genes13030524 (PMC8950999; doi:10.3390/genes13030524)
Supplement: Supplementary file 1 [file genes-13-00524-s001.zip › Table S8 Genes co-expressed with CAM1, CIPK8, GAD1, and GUN5.xlsx]

## Sheet: Sheet1
Table S8. Genes co-expressed with CAM1, CIPK8, GAD1, and GUN5.
Ensembl ID	Gene Name	Coexpression with CAM1	Coexpression with CIPK8	Coexpression with GAD1
AT5G57740	XBAT32	CAM1	CIPK8	GAD1
AT3G54320	WRI1	CAM1	CIPK8	GAD1
AT1G69935	SHW1	CAM1	CIPK8	GAD1
AT3G05890	RCI2B	CAM1	CIPK8	GAD1
ATCG00080	psb1	CAM1	CIPK8	GAD1
AT1G77130	PGSIP2	CAM1	CIPK8	GAD1
ATCG01100	ndhA	CAM1	CIPK8	GAD1
AT4G26110	NAP1;1	CAM1	CIPK8	GAD1
AT1G74740	CPK30	CAM1	CIPK8	GAD1
AT4G37010	CML19	CAM1	CIPK8	GAD1
AT5G47100	CBL9	CAM1	CIPK8	GAD1
AT3G43810	CAM7	CAM1	CIPK8	GAD1
AT1G66410	CAM4	CAM1	CIPK8	GAD1
AT1G64330	AT1G64330	CAM1	CIPK8	GAD1
AT1G16060	ADAP	CAM1	CIPK8	GAD1
AT2G24610	CNGC14	CAM1	CIPK8	GAD1
AT5G64040	PSAN	CAM1	CIPK8	GAD1
AT5G48870	SAD1	CAM1	CIPK8	GAD1
AT1G53590	NTMC2T6.1	CAM1	CIPK8	GAD1
AT2G34900	IMB1	CAM1	CIPK8	GAD1
AT1G02780	EMB2386	CAM1	CIPK8	GAD1
AT4G14580	CIPK4	CAM1	CIPK8	GAD1
AT5G09530	PRP10	CAM1	CIPK8	GAD1
AT4G25780	CAPE2	CAM1	CIPK8	GAD1
AT4G02230	AT4G02230	CAM1	CIPK8	GAD1
AT3G22240	AT3G22240	CAM1	CIPK8	GAD1
AT3G19370	AT3G19370	CAM1	CIPK8	GAD1
AT3G01290	HIR2	CAM1	CIPK8	GAD1
AT1G54410	HIRD11	CAM1	CIPK8	GAD1
AT1G28400	AT1G28400	CAM1	CIPK8	GAD1
AT5G13680	ABO1	CAM1	CIPK8	GAD1
AT2G36910	ABCB1	CAM1	CIPK8	GAD1
AT2G38800	AT2G38800	CAM1	CIPK8	GAD1
AT5G13630	GUN5	CAM1	CIPK8	GAD1
AT5G17330	GAD1	CAM1	CIPK8
ATCG00740	RPOA	CAM1		GAD1
AT1G79040	PSBR	CAM1		GAD1
AT2G43040	NPG1	CAM1		GAD1
AT1G10130	ECA3	CAM1		GAD1
AT4G38230	CPK26	CAM1		GAD1
AT3G16780	AT3G16780	CAM1		GAD1
AT4G24400	CIPK8	CAM1		GAD1
AT2G22560	NET2D	CAM1		GAD1
AT5G56540	AGP14	CAM1		GAD1
AT5G37780	CAM1		CIPK8	GAD1
AT5G67240	SDN3		CIPK8	GAD1
AT3G25230	ROF1		CIPK8	GAD1
AT2G29980	FAD3		CIPK8	GAD1
AT3G25820	TPS-CIN		CIPK8	GAD1
AT4G26190	AT4G26190		CIPK8	GAD1
AT3G16530	AT3G16530		CIPK8	GAD1
AT2G21560	AT2G21560		CIPK8	GAD1
AT1G01360	RCAR1		CIPK8
AT3G56760	AT3G56760		CIPK8
AT4G34890	XDH1			GAD1
AT5G56360	PSL4			GAD1
AT1G44910	PRP40A			GAD1
AT2G42680	MBF1A			GAD1
AT4G38130	HD1			GAD1
AT5G58760	DDB2			GAD1
AT5G04870	CPK1			GAD1
AT5G57630	CIPK21			GAD1
AT2G27030	CAM5			GAD1
AT3G50360	CML20			GAD1
AT4G26570	CBL3			GAD1
AT1G18080	ATARCA			GAD1
AT5G64120	PRX71			GAD1
AT5G20910	AT5G20910			GAD1
AT4G35060	AT4G35060			GAD1
AT4G34750	SAUR49			GAD1
AT3G45160	AT3G45160			GAD1
AT1G12310	CML13			GAD1
AT3G18170	AT3G18170			GAD1
